# Supplementary material for: Thrombotic and hemorrhagic complications of COVID-19 in adults hospitalized in high-income countries compared with those in adults hospitalized in low- and middle-income countries in an international registry
Source: PubMed Central journal article supplement — Res Pract Thromb Haemost. 2023 Jul 1;7(5):102142. doi: 10.1016/j.rpth.2023.102142 (PMC10439444; doi:10.1016/j.rpth.2023.102142), 2023-07-01
Supplement: mmc2.pdf [file mmc2.pdf]

## CRF Completion Guide

### DESIGN OF THIS CASE REPORT FORM (CRF)

This CRF is set up in modules to be used for recording data on the ISARIC\_nCov Core Database or for independent studies.

**Module 1 and Module 2** complete on the first day of admission or on first day of COVID-19 assessment.

**Module 2** also complete on first day of admission to ICU or high dependency unit. In addition, complete daily for as many days as resources allow up to a maximum of 14 days. Continue to follow-up patients who transfer between wards.

**Module 3** (Outcome) complete at discharge or death

### GENERAL GUIDANCE

- The CRF is designed to collect data obtained through examination, interview and review of hospital notes. Data may be collected prospectively or retrospectively if the patient is enrolled after the admission date.
- Participant Identification Numbers consist of a 5 digit site code and a 4 digit participant number. You can obtain a site code and registering on the data management system by contacting [ncov@isaric.org](mailto:ncov@isaric.org). Participant numbers should be assigned sequentially for each site beginning with 0001. In the case of a single site recruiting participants on different wards, or where it is otherwise difficult to assign sequential numbers, it is acceptable to assign numbers in blocks or incorporating alpha characters. E.g. Ward X will assign numbers from 0001 or A001 onwards and Ward Y will assign numbers from 5001 or B001 onwards. Enter the Participant Identification Number at the top of every page.
- Printed paper CRFs may be used for later transfer of the data onto the electronic database.
- In the case of a participant transferring between sites, it is preferred to maintain the same Participant Identification Number (PIN) across the sites. When this is not possible, the first site should record 'Transfer to other facility' as an OUTCOME and the second site should start a new form with a new PIN and indicate 'YES-transferred' in the RE-ADMISSION section. If the PIN from the previous site is eventually obtained this can be entered under 'If YES 'Participant Identification Number:'
- For participants who are re-admitted with COVID-19 to the same site, **start a new form with a different Participant Identification Number (PIN)** and enter the previous PIN in response to the question 'Previous participant ID'.
- Complete every line of every section, except where the instructions say to skip a section based on a response.
- Selections with circles (○) are single selection answers (choose one answer only). Selections with square boxes (□) are multiple selection answers (choose as many answers as are applicable).
- Mark 'Not done' for any results of laboratory values that are not available, not applicable or unknown.
- Avoid recording data outside of the dedicated areas. Sections are available for recording additional information.
- If using paper CRFs, we recommend writing clearly in ink, using BLOCK-CAPITAL LETTERS.
- Place an (X) when you choose the corresponding answer. To make corrections, strike through (-----) the data you wish to delete and write the correct data above it. Please initial and date all corrections.
- Please keep all of the sheets for a single participant together e.g. with a staple or participant-unique folder.
- Please transfer all paper CRF data to the electronic database. All paper CRFs needs to be stored locally, do not send any forms to us. Data are accepted only via secure electronic database.
- Please enter data on the electronic data capture system at <https://ncov.medsci.ox.ac.uk/>. If your site would like to collect data independently, we are happy to support the establishment of locally hosted databases.
- Please contact us at [ncov@isaric.org](mailto:ncov@isaric.org) if you need help with databases, if you have comments and to let us know that you are using the forms.

## CRF Completion Guide

### **FURTHER GUIDANCE AND DEFINITIONS**

#### **Comorbidities**

Comorbidities present before the onset of COVID-19 and are still present. Do not include those that developed following the onset of COVID-19 symptoms. More detailed guidance is provided.

#### **Hospital admission**

For patients who were admitted to hospital with COVID-19 or symptoms consistent with possible COVID-19 infection, please enter details for the date of hospital admission. For patients with a clear alternative diagnosis leading to admission who subsequently acquired COVID-19, original admission date should be provided, but all subsequent references to admission should be taken as referring to day COVID-19 was first clinically suspected (or within the first 24 hours after first day of suspected or confirmed COVID-19 infection).

Where a patient was admitted via multiple hospital departments, count admission from the time they came to the first department during the visit that led to their admission (e.g. arrival at the Emergency Department).

#### **Oxygen therapy**

Include any form of supplemental oxygen received using any methods.

##### **Invasive ventilation**

Please include any mechanical ventilation delivered following intubation or via a tracheostomy. Do not include patients who are breathing independently via a tracheostomy.

##### **Non-invasive ventilation**

Please include any positive-pressure treatment given via a tight-fitted mask. This can be continuous positive pressure (CPAP) or bi-level positive pressure (BIPAP).

##### **Renal replacement therapy or dialysis**

Please include any form of continuous renal replacement therapy or intermittent haemodialysis.

##### **Worst result**

References to 'worst result' refer to those furthest from the normal physiological range or laboratory normal range.

Results that were rejected by the clinical team (e.g. pulse oximetry on poorly perfused extremities, haemolysed blood samples, contaminated microbiology results) should not be reported.

The following measures should be considered as a single observation and entered together:

Blood gas results: Please report the measures from the blood gas with the lowest pH (most acidotic).

Blood pressure: Please report the systolic and diastolic blood pressure from the observation with the lowest mean arterial pressure (if mean arterial pressure has not been calculated, report the measurement with lowest systolic blood pressure).

Respiratory rate: If both abnormal low and high rate observed, record the abnormally high rate.

## MODULE 1: PRESENTATION/ADMISSION CASE REPORT FORM

### CLINICAL INCLUSION CRITERIA

#### Suspected or confirmed novel coronavirus (COVID-19) infection:

Select yes if patient has either clinically suspected or laboratory-confirmed SARS-CoV-2 /COVID-19 infection.

### DEMOGRAPHICS

**Enrolment date:** Date of enrolment into the study or for in-patients is the date that COVID-19 was first assessed as suspected or confirmed by a clinician.

#### Ethnic group:

Please enter all that apply of the following choices which best describe the patient’s ethnicity or major ethnic group at birth. Please exclude nationality as nations often include many different ethnic groups (For example, Singaporean is the nationality but the ethnic grouping within Singapore could be East Asian, South Asian etc.) Cross (X) all that apply. If ‘Other’ write the full name of the ethnic group of the patient. Please do not enter a letter or number corresponding to a local/national ethnicity coding system.

If the patient’s ethnicity is not known, please place a cross (X) in the ‘Unknown’ box.

**Post-partum:** Defined as within six weeks of delivery.

If the baby is positive for COVID-19 please complete a separate form for the baby as well.

### ONSET & ADMISSION

**Onset date of first/earliest symptom:** Please provide the date of patient reported onset of the first symptom that you clinically believe was related to this episode of COVID-19 infection.

#### Most recent presentation/admission date at this facility:

Where a patient was admitted via multiple hospital departments, count admission from the time they came to the first department during the visit that led to their admission (e.g. arrival at the Emergency Department). For patients with a clear alternative diagnosis leading to admission who subsequently acquired COVID-19 report the date of admission as the day they were admitted to the healthcare facility.

### RE-ADMISSION

#### Was the patient admitted previously or transferred from any other facility during this illness episode?

For participants who return for re-admission to the same site, start a new form with the same Participant Identification Number. Please check “YES-admitted previously to this facility”. Enter each re-admission as a separate entry in the electronic database.

For participants who transfer between two sites that are both collecting data on this form, it is preferred to have the data entered by a single site as a single admission, under the same Participant Identification Number. When this is not possible, the first site should record “Transfer to other facility” as an OUTCOME, and the second site should start a new form with a new patient number and indicate “YES-transferred from other facility” in RE- ADMISSION.

For participants who return for re-admission to the same site, **start a new form with a different Participant Identification Number.** Please check “YES-admitted previously to this facility” in the RE-ADMISSION section. Enter as a separate entry in the electronic database.

## MODULE 1: PRESENTATION/ADMISSION CASE REPORT FORM

| CLINICAL INCLUSION CRITERIA                                                                                                                                                                                                                                                                                                                                                                                    |  |
|----------------------------------------------------------------------------------------------------------------------------------------------------------------------------------------------------------------------------------------------------------------------------------------------------------------------------------------------------------------------------------------------------------------|--|
| Suspected or confirmed novel coronavirus (COVID-19) infection: <input type="radio"/> YES <input type="radio"/> NO                                                                                                                                                                                                                                                                                              |  |
| DEMOGRAPHICS                                                                                                                                                                                                                                                                                                                                                                                                   |  |
| Clinical centre name: _____ Country: _____                                                                                                                                                                                                                                                                                                                                                                     |  |
| Enrolment date /first COVID-19 assessment date: [D_][D_]/[M_][M_]/[2_][0_][Y_][Y_]                                                                                                                                                                                                                                                                                                                             |  |
| Ethnic group (check all that apply): <input type="checkbox"/> Arab <input type="checkbox"/> Black <input type="checkbox"/> East Asian <input type="checkbox"/> South Asian <input type="checkbox"/> West Asian <input type="checkbox"/> Latin American <input type="checkbox"/> White <input type="checkbox"/> Aboriginal/First Nations <input type="checkbox"/> Other: _____ <input type="checkbox"/> Unknown |  |
| Employed as a Healthcare Worker? <input type="radio"/> YES <input type="radio"/> NO <input type="radio"/> Unknown Employed in a microbiology laboratory? <input type="radio"/> YES <input type="radio"/> NO <input type="radio"/> Unknown                                                                                                                                                                      |  |
| Sex at Birth: <input type="radio"/> Male <input type="radio"/> Female <input type="radio"/> Not specified/Unknown Age [ ][ ] years OR [ ][ ] months                                                                                                                                                                                                                                                            |  |
| Pregnant? <input type="radio"/> YES <input type="radio"/> NO <input type="radio"/> Unknown If YES: Gestational weeks assessment: [ ][ ] weeks                                                                                                                                                                                                                                                                  |  |
| POST PARTUM (within 6 weeks of delivery)? <input type="radio"/> YES <input type="radio"/> NO <input type="radio"/> Unknown (if NO or Unknown skip this section)                                                                                                                                                                                                                                                |  |
| Pregnancy Outcome: <input type="radio"/> Live birth <input type="radio"/> Still birth Delivery date: [D_][D_]/[M_][M_]/[2_][0_][Y_][Y_]                                                                                                                                                                                                                                                                        |  |
| Baby tested for COVID-19/SARS-CoV-2 infection? <input type="radio"/> YES <input type="radio"/> NO <input type="radio"/> Unknown                                                                                                                                                                                                                                                                                |  |
| If YES, result of test: <input type="radio"/> Positive <input type="radio"/> Negative <input type="radio"/> Unknown (If Positive, complete a separate CRF for baby)                                                                                                                                                                                                                                            |  |
| INFANT – Less than 1 year old? <input type="radio"/> YES <input type="radio"/> NO (If NO skip this section)                                                                                                                                                                                                                                                                                                    |  |
| Birth weight: [ ][ ].[ ][ ] kg or <input type="radio"/> lbs <input type="radio"/> Unknown                                                                                                                                                                                                                                                                                                                      |  |
| Gestational outcome: <input type="radio"/> Term birth (≥37wk GA) <input type="radio"/> Preterm birth (<37wk GA) <input type="radio"/> Unknown                                                                                                                                                                                                                                                                  |  |
| Breastfed? <input type="radio"/> YES-currently breastfeeding <input type="radio"/> YES-breastfeeding discontinued <input type="radio"/> NO <input type="radio"/> Unknown                                                                                                                                                                                                                                       |  |
| Vaccinations appropriate for age/country? <input type="radio"/> YES <input type="radio"/> NO <input type="radio"/> Unknown                                                                                                                                                                                                                                                                                     |  |
| ONSET & ADMISSION                                                                                                                                                                                                                                                                                                                                                                                              |  |
| Onset date of first/earliest symptom: [D_][D_]/[M_][M_]/[2_][0_][Y_][Y_]                                                                                                                                                                                                                                                                                                                                       |  |
| Most recent presentation/admission date at this facility: [D_][D_]/[M_][M_]/[2_][0_][Y_][Y_]                                                                                                                                                                                                                                                                                                                   |  |
| RE-ADMISSION                                                                                                                                                                                                                                                                                                                                                                                                   |  |
| Was the patient admitted previously or transferred from any other facility during this illness episode?                                                                                                                                                                                                                                                                                                        |  |
| <input type="radio"/> YES-admitted previously to this facility <input type="radio"/> YES–transferred from other facility <input type="radio"/> NO <input type="radio"/> Unknown                                                                                                                                                                                                                                |  |
| Has this patient’s data been previously collected under a different patient number? <input type="radio"/> YES <input type="radio"/> NO <input type="radio"/> Unknown                                                                                                                                                                                                                                           |  |
| If YES, Participant Identification number (PIN): _____                                                                                                                                                                                                                                                                                                                                                         |  |
| Is the patient being re-admitted with or due to COVID-19? (Please only add re-admission episodes for COVID related complications or patients remaining positive). Assign new subject ID <input type="radio"/> YES <input type="radio"/> NO <input type="radio"/> Unknown                                                                                                                                       |  |
| Previous participant ID: _____ <input type="radio"/> Unknown                                                                                                                                                                                                                                                                                                                                                   |  |
| Number of re-admissions: _____ (record as a new patient for each re-admission)                                                                                                                                                                                                                                                                                                                                 |  |
| Please provide reason for readmission: _____                                                                                                                                                                                                                                                                                                                                                                   |  |

### SIGNS AND SYMPTOMS AT HOSPITAL ADMISSION

Please provide details of clinical observations made as close to presentation/admission, or within 24 hours of admission. For observations not made immediately at admission, please record the first available data (patient reported and/or from medical records) within 24 hours of admission. For patients with a clear alternative diagnosis leading to admission who subsequently acquired COVID-19, complete these observations for the 24 hours after onset of symptoms of suspected or confirmed COVID-19 infection.

#### Temperature

Please enter the peripheral body temperature (rectal if < 3 months) in the space provided and indicate the unit of measurement, either degrees Celsius (°C) or Fahrenheit (°F).

#### Heart rate (HR)

Enter the heart rate measured in beats per minute. This may be measured manually or by electronic monitoring.

#### Respiratory rate (RR)

Enter the respiratory rate in breaths per minute. Manual rather than electronic measurement is preferred where possible (this is achieved by counting the number of breaths for one minute, counting how many times the chest rises within this time period). Record the highest respiratory rate documented on admission.

#### Systolic BP

Please enter the systolic blood pressure measured in millimetres of mercury (mmHg), in the relevant sections. For example, if the blood pressure is 120/85 mmHg, enter 120 in the section marked 'systolic BP'. Use any recognised method for measuring blood pressure.

#### Diastolic BP

Please enter the diastolic blood pressure measured in millimetres of mercury (mmHg), in the relevant sections. For example, if the blood pressure is 120/85 mmHg, enter 85 in the section marked 'diastolic BP'. Use any recognised method for measuring blood pressure.

#### Oxygen saturation

For all patients, irrespective of ventilation or supplemental oxygen requirement, please enter the percentage oxygen saturation (the percentage of haemoglobin binding sites in the bloodstream occupied by oxygen) at the time of admission. This may be measured by pulse oximetry or by arterial blood gas analysis.

#### Sternal capillary refill time > 2 seconds?

Sternal capillary refill time is measured by pressing on the sternum for five seconds with a finger or thumb until the underlying skin turns white and then noting the time in seconds needed for the colour to return once the pressure is released.

### MODULE 1: PRESENTATION/ADMISSION CASE REPORT FORM

| SIGNS AND SYMPTOMS AT HOSPITAL ADMISSION (first available data at presentation/admission – within 24 hours)                         |                                         |
|-------------------------------------------------------------------------------------------------------------------------------------|-----------------------------------------|
| Temperature: [ ][ ][ ]:[ ][ ]°C or °F                                                                                               |                                         |
| HR: [ ][ ][ ]beats/minute                                                                                                           | RR: [ ][ ][ ]breaths/minute             |
| Systolic BP: [ ][ ][ ]mmHg                                                                                                          | Diastolic BP: [ ][ ][ ]mmHg             |
| Oxygen saturation: [ ][ ][ ]% On: <input type="radio"/> Room air <input type="radio"/> Oxygen therapy <input type="radio"/> Unknown |                                         |
| Sternal capillary refill time >2sec. <input type="radio"/> YES <input type="radio"/> NO <input type="radio"/> Unknown               | Height: [ ][ ][ ]cm Weight: [ ][ ][ ]kg |

| SIGNS AND SYMPTOMS ON ADMISSION (Unk = Unknown)                                                                                                                                         |                                                                              |                                 |                                                                              |
|-----------------------------------------------------------------------------------------------------------------------------------------------------------------------------------------|------------------------------------------------------------------------------|---------------------------------|------------------------------------------------------------------------------|
| History of fever                                                                                                                                                                        | <input type="radio"/> YES <input type="radio"/> NO <input type="radio"/> Unk | Fatigue / Malaise               | <input type="radio"/> YES <input type="radio"/> NO <input type="radio"/> Unk |
| Cough <input type="radio"/> YES - non-productive <input type="radio"/> YES - productive <input type="radio"/> YES - with haemoptysis <input type="radio"/> NO <input type="radio"/> Unk |                                                                              | Anorexia                        | <input type="radio"/> YES <input type="radio"/> NO <input type="radio"/> Unk |
|                                                                                                                                                                                         |                                                                              | Altered consciousness/confusion | <input type="radio"/> YES <input type="radio"/> NO <input type="radio"/> Unk |
| Sore throat                                                                                                                                                                             | <input type="radio"/> YES <input type="radio"/> NO <input type="radio"/> Unk | Muscle aches (myalgia)          | <input type="radio"/> YES <input type="radio"/> NO <input type="radio"/> Unk |
| Runny nose (rhinorrhoea)                                                                                                                                                                | <input type="radio"/> YES <input type="radio"/> NO <input type="radio"/> Unk | Joint pain (arthralgia)         | <input type="radio"/> YES <input type="radio"/> NO <input type="radio"/> Unk |
| Wheezing                                                                                                                                                                                | <input type="radio"/> YES <input type="radio"/> NO <input type="radio"/> Unk | Inability to walk               | <input type="radio"/> YES <input type="radio"/> NO <input type="radio"/> Unk |
| Shortness of breath                                                                                                                                                                     | <input type="radio"/> YES <input type="radio"/> NO <input type="radio"/> Unk | Abdominal pain                  | <input type="radio"/> YES <input type="radio"/> NO <input type="radio"/> Unk |
| Lower chest wall indrawing                                                                                                                                                              | <input type="radio"/> YES <input type="radio"/> NO <input type="radio"/> Unk | Diarrhoea                       | <input type="radio"/> YES <input type="radio"/> NO <input type="radio"/> Unk |
| Chest pain                                                                                                                                                                              | <input type="radio"/> YES <input type="radio"/> NO <input type="radio"/> Unk | Vomiting / Nausea               | <input type="radio"/> YES <input type="radio"/> NO <input type="radio"/> Unk |
| Conjunctivitis                                                                                                                                                                          | <input type="radio"/> YES <input type="radio"/> NO <input type="radio"/> Unk | Skin rash                       | <input type="radio"/> YES <input type="radio"/> NO <input type="radio"/> Unk |
| Lymphadenopathy                                                                                                                                                                         | <input type="radio"/> YES <input type="radio"/> NO <input type="radio"/> Unk | Bleeding (Haemorrhage)          | <input type="radio"/> YES <input type="radio"/> NO <input type="radio"/> Unk |
| Headache                                                                                                                                                                                | <input type="radio"/> YES <input type="radio"/> NO <input type="radio"/> Unk | If YES, specify site(s): _____  |                                                                              |
| Loss of smell (Anosmia)                                                                                                                                                                 | <input type="radio"/> YES <input type="radio"/> NO <input type="radio"/> Unk | Other symptom(s)                | <input type="radio"/> YES <input type="radio"/> NO <input type="radio"/> Unk |
| Loss of taste (Ageusia)                                                                                                                                                                 | <input type="radio"/> YES <input type="radio"/> NO <input type="radio"/> Unk | If YES, specify: _____          |                                                                              |
| Seizures                                                                                                                                                                                | <input type="radio"/> YES <input type="radio"/> NO <input type="radio"/> Unk |                                 |                                                                              |

| VACCINATIONS                                                                                                                                                                                                                                                                                                                                                                                                                                                                                                                                                                                                                                                                                                                                                                                                                                                                                                                                                                                                                                                                                                                                                                                                                                                                                                                                                                                                                                                                                                                                                                                                                                                                                                                                                                                                                                                                                                                                                                                   |
|------------------------------------------------------------------------------------------------------------------------------------------------------------------------------------------------------------------------------------------------------------------------------------------------------------------------------------------------------------------------------------------------------------------------------------------------------------------------------------------------------------------------------------------------------------------------------------------------------------------------------------------------------------------------------------------------------------------------------------------------------------------------------------------------------------------------------------------------------------------------------------------------------------------------------------------------------------------------------------------------------------------------------------------------------------------------------------------------------------------------------------------------------------------------------------------------------------------------------------------------------------------------------------------------------------------------------------------------------------------------------------------------------------------------------------------------------------------------------------------------------------------------------------------------------------------------------------------------------------------------------------------------------------------------------------------------------------------------------------------------------------------------------------------------------------------------------------------------------------------------------------------------------------------------------------------------------------------------------------------------|
| <p><b>Covid-19 vaccination:</b> <input type="radio"/>YES <input type="radio"/>NO <input type="radio"/>Unk</p> <p>Date of first vaccine: [D][D]/[M][M]/[2][0][Y][Y] Date: <input type="radio"/>actual <input type="radio"/>estimated</p> <p>Type of first vaccine: <input type="radio"/>Pfizer/BioNTech <input type="radio"/>AstraZeneca Oxford (Covishield in India) <input type="radio"/>Moderna <input type="radio"/>Novavax <input type="radio"/>Janssens (Johnson &amp; Johnson) <input type="radio"/>Sinopharm <input type="radio"/>Sinovac <input type="radio"/>Sputnik V <input type="radio"/>Covaxin <input type="radio"/>CanSinoBIO <input type="radio"/>Unknown <input type="radio"/>Other, please specify _____</p> <p>Date of second vaccine: [D][D]/[M][M]/[2][0][Y][Y] Date: <input type="radio"/>actual <input type="radio"/>estimated</p> <p>Type of second vaccine: <input type="radio"/>Pfizer/BioNTech <input type="radio"/>AstraZeneca/University of Oxford (Covishield in India) <input type="radio"/>Moderna <input type="radio"/>Novavax <input type="radio"/>Janssens (Johnson &amp; Johnson) <input type="radio"/>Sinopharm <input type="radio"/>Sinovac <input type="radio"/>Sputnik V <input type="radio"/>Covaxin <input type="radio"/>CanSinoBIO <input type="radio"/>Unknown <input type="radio"/>Other, please specify _____</p> <p>Date of third vaccine: [D][D]/[M][M]/[2][0][Y][Y] Date: <input type="radio"/>actual <input type="radio"/>estimated</p> <p>Type of third vaccine: <input type="radio"/>Pfizer/BioNTech <input type="radio"/>AstraZeneca/University of Oxford (Covishield in India) <input type="radio"/>Moderna <input type="radio"/>Novavax <input type="radio"/>Janssens (Johnson &amp; Johnson) <input type="radio"/>Sinopharm <input type="radio"/>Sinovac <input type="radio"/>Sputnik V <input type="radio"/>Covaxin <input type="radio"/>CanSinoBIO <input type="radio"/>Unknown <input type="radio"/>Other, please specify _____</p> |
| <p><b>Influenza vaccination within the last 6 months:</b> <input type="radio"/>YES <input type="radio"/>NO <input type="radio"/>Unknown</p> <p>Date of influenza vaccine: [D][D]/[M][M]/[2][0][Y][Y] Date: <input type="radio"/>actual <input type="radio"/>estimated</p>                                                                                                                                                                                                                                                                                                                                                                                                                                                                                                                                                                                                                                                                                                                                                                                                                                                                                                                                                                                                                                                                                                                                                                                                                                                                                                                                                                                                                                                                                                                                                                                                                                                                                                                      |

## COVID-19 CORE CASE REPORT FORM Completion Guide

### SIGNS AND SYMPTOMS ON ADMISSION

Please provide details of clinical observations made as close to presentation/admission, or within 24 hours of admission. For observations not made immediately at admission, please record the first available data (patient reported and/or from medical records) within 24 hours of admission. For patients with a clear alternative diagnosis leading to admission who subsequently acquired COVID-19, complete these observations for the 24 hours after onset of symptoms of suspected or confirmed COVID-19 infection.

### VACCINATIONS

If the exact dates of COVID-19 vaccinations are not available, please provide an estimate of the day the vaccine was given. Partial dates (e.g. Jan-2021) cannot be entered in the database.

### MODULE 1: PRESENTATION/ADMISSION CASE REPORT FORM

| SIGNS AND SYMPTOMS AT HOSPITAL ADMISSION <i>(first available data at presentation/admission – within 24 hours)</i>                  |                                              |
|-------------------------------------------------------------------------------------------------------------------------------------|----------------------------------------------|
| Temperature: [ ][ ][ ]:[ ][ ]°C or [ ][ ]°F                                                                                         |                                              |
| HR: [ ][ ][ ]beats/minute                                                                                                           | RR: [ ][ ][ ]breaths/minute                  |
| Systolic BP: [ ][ ][ ]mmHg                                                                                                          | Diastolic BP: [ ][ ][ ]mmHg                  |
| Oxygen saturation: [ ][ ][ ]% On: <input type="radio"/> Room air <input type="radio"/> Oxygen therapy <input type="radio"/> Unknown |                                              |
| Sternal capillary refill time >2sec. <input type="radio"/> YES <input type="radio"/> NO <input type="radio"/> Unknown               | Height: [ ][ ][ ]cm      Weight: [ ][ ][ ]kg |

| SIGNS AND SYMPTOMS ON ADMISSION <i>(Unk = Unknown)</i> |                                                                              |                                 |                                                                              |
|--------------------------------------------------------|------------------------------------------------------------------------------|---------------------------------|------------------------------------------------------------------------------|
| History of fever                                       | <input type="radio"/> YES <input type="radio"/> NO <input type="radio"/> Unk | Fatigue / Malaise               | <input type="radio"/> YES <input type="radio"/> NO <input type="radio"/> Unk |
| Cough <input type="radio"/> YES - non-productive       | <input type="radio"/> YES - productive                                       | Anorexia                        | <input type="radio"/> YES <input type="radio"/> NO <input type="radio"/> Unk |
| <input type="radio"/> YES - with haemoptysis           | <input type="radio"/> NO <input type="radio"/> Unk                           | Altered consciousness/confusion | <input type="radio"/> YES <input type="radio"/> NO <input type="radio"/> Unk |
| Sore throat                                            | <input type="radio"/> YES <input type="radio"/> NO <input type="radio"/> Unk | Muscle aches (myalgia)          | <input type="radio"/> YES <input type="radio"/> NO <input type="radio"/> Unk |
| Runny nose (rhinorrhoea)                               | <input type="radio"/> YES <input type="radio"/> NO <input type="radio"/> Unk | Joint pain (arthralgia)         | <input type="radio"/> YES <input type="radio"/> NO <input type="radio"/> Unk |
| Wheezing                                               | <input type="radio"/> YES <input type="radio"/> NO <input type="radio"/> Unk | Inability to walk               | <input type="radio"/> YES <input type="radio"/> NO <input type="radio"/> Unk |
| Shortness of breath                                    | <input type="radio"/> YES <input type="radio"/> NO <input type="radio"/> Unk | Abdominal pain                  | <input type="radio"/> YES <input type="radio"/> NO <input type="radio"/> Unk |
| Lower chest wall indrawing                             | <input type="radio"/> YES <input type="radio"/> NO <input type="radio"/> Unk | Diarrhoea                       | <input type="radio"/> YES <input type="radio"/> NO <input type="radio"/> Unk |
| Chest pain                                             | <input type="radio"/> YES <input type="radio"/> NO <input type="radio"/> Unk | Vomiting / Nausea               | <input type="radio"/> YES <input type="radio"/> NO <input type="radio"/> Unk |
| Conjunctivitis                                         | <input type="radio"/> YES <input type="radio"/> NO <input type="radio"/> Unk | Skin rash                       | <input type="radio"/> YES <input type="radio"/> NO <input type="radio"/> Unk |
| Lymphadenopathy                                        | <input type="radio"/> YES <input type="radio"/> NO <input type="radio"/> Unk | Bleeding (Haemorrhage)          | <input type="radio"/> YES <input type="radio"/> NO <input type="radio"/> Unk |
| Headache                                               | <input type="radio"/> YES <input type="radio"/> NO <input type="radio"/> Unk | If YES, specify site(s): _____  |                                                                              |
| Loss of smell (Anosmia)                                | <input type="radio"/> YES <input type="radio"/> NO <input type="radio"/> Unk | Other symptom(s)                | <input type="radio"/> YES <input type="radio"/> NO <input type="radio"/> Unk |
| Loss of taste (Ageusia)                                | <input type="radio"/> YES <input type="radio"/> NO <input type="radio"/> Unk | If YES, specify: _____          |                                                                              |
| Seizures                                               | <input type="radio"/> YES <input type="radio"/> NO <input type="radio"/> Unk |                                 |                                                                              |

| VACCINATIONS                                                                                                                                                                                                                                                                                                                                                                                                                                                                                                                   |
|--------------------------------------------------------------------------------------------------------------------------------------------------------------------------------------------------------------------------------------------------------------------------------------------------------------------------------------------------------------------------------------------------------------------------------------------------------------------------------------------------------------------------------|
| Covid-19 vaccination: <input type="radio"/> YES <input type="radio"/> NO <input type="radio"/> Unk                                                                                                                                                                                                                                                                                                                                                                                                                             |
| Date of first vaccine : [ ][ ][ ]/[ ][ ][ ]/[ ][ ][ ][ ][ ] Date: <input type="radio"/> actual <input type="radio"/> estimated                                                                                                                                                                                                                                                                                                                                                                                                 |
| Type of first vaccine: <input type="radio"/> Pfizer/BioNTech   <input type="radio"/> AstraZeneca Oxford (Covishield in India)   <input type="radio"/> Moderna   <input type="radio"/> Novavax<br><input type="radio"/> Janssens (Johnson & Johnson)   <input type="radio"/> Sinopharm   <input type="radio"/> Sinovac   <input type="radio"/> Sputnik V   <input type="radio"/> Covaxin   <input type="radio"/> CanSinoBIO<br><input type="radio"/> Unknown   <input type="radio"/> Other, please specify _____                |
| Date of second vaccine : [ ][ ][ ]/[ ][ ][ ]/[ ][ ][ ][ ][ ] Date: <input type="radio"/> actual <input type="radio"/> estimated                                                                                                                                                                                                                                                                                                                                                                                                |
| Type of second vaccine: <input type="radio"/> Pfizer/BioNTech   <input type="radio"/> AstraZeneca/University of Oxford (Covishield in India)   <input type="radio"/> Moderna   <input type="radio"/> Novavax<br><input type="radio"/> Janssens (Johnson & Johnson)   <input type="radio"/> Sinopharm   <input type="radio"/> Sinovac   <input type="radio"/> Sputnik V   <input type="radio"/> Covaxin   <input type="radio"/> CanSinoBIO<br><input type="radio"/> Unknown   <input type="radio"/> Other, please specify _____ |
| Date of third vaccine : [ ][ ][ ]/[ ][ ][ ]/[ ][ ][ ][ ][ ] Date: <input type="radio"/> actual <input type="radio"/> estimated                                                                                                                                                                                                                                                                                                                                                                                                 |
| Type of third vaccine: <input type="radio"/> Pfizer/BioNTech   <input type="radio"/> AstraZeneca/University of Oxford (Covishield in India)   <input type="radio"/> Moderna   <input type="radio"/> Novavax<br><input type="radio"/> Janssens (Johnson & Johnson)   <input type="radio"/> Sinopharm   <input type="radio"/> Sinovac   <input type="radio"/> Sputnik V   <input type="radio"/> Covaxin   <input type="radio"/> CanSinoBIO<br><input type="radio"/> Unknown   <input type="radio"/> Other, please specify _____  |
| Influenza vaccination within the last 6 months: <input type="radio"/> YES <input type="radio"/> NO <input type="radio"/> Unknown                                                                                                                                                                                                                                                                                                                                                                                               |
| Date of influenza vaccine : [ ][ ][ ]/[ ][ ][ ]/[ ][ ][ ][ ][ ] Date: <input type="radio"/> actual <input type="radio"/> estimated                                                                                                                                                                                                                                                                                                                                                                                             |

### PRE-ADMISSION MEDICATION *(taken within 14 days of admission/presentation at healthcare facility)*

**Steroids:** Examples include prednisolone, betamethasone, dexamethasone, hydrocortisone, methylprednisolone, deflazacort and fludrocortisone (oral), budesonide, fluticasone (inhaled).

**Other immunosuppressant agents (not oral steroids):** Examples include tofacitinib, cyclosporine, tacrolimus, sirolimus, everolimus, azathioprine, leflunomide, mycophenolate and biologics such as abatacept, adalimumab, anakinra, certolizumab, etanercept, adalimumab, infliximab and rituximab.

**Antibiotics:** 'Antibiotic' refers to any agent(s) that selectively target bacteria. Please list generic names. Topical preparations should not be recorded.

**Antivirals:** Examples include ribavirin, lopinavir, ritonavir, remdesivir, oseltamivir, zanamivir, acyclovir, ganciclovir, and interferons. Please list generic names. Topical preparations should not be recorded.

**Other targeted COVID-19 Medications:** Includes for example: chloroquine, hydroxychloroquine, Interferon antibodies, convalescent plasma or any other COVID-19 therapeutics not included in the categories listed above. Please list generic names.

**General Note:** For free text entry of medications, please ensure correct spelling. For reference you may use: [www.drugs.com](http://www.drugs.com)

### CO-MORBIDITIES AND RISK FACTORS

Please record if any of these comorbidities existed prior to admission.

In general, do not include past comorbidities that are no longer ongoing. Additional details are given below. Where example conditions are given, these are not intended to be exhaustive and other conditions of equivalent severity should be included.

#### Chronic cardiac disease (not hypertension)

Please include any of coronary artery disease, heart failure, congenital heart disease, cardiomyopathy, rheumatic heart disease.

#### Hypertension

Elevated arterial blood pressure diagnosed clinically, >140mmHg systolic or >90mmHg diastolic.

#### Chronic pulmonary disease (not asthma)

Please include any of chronic obstructive pulmonary disease (chronic bronchitis, chronic obstructive pulmonary disease (COPD), emphysema), cystic fibrosis, bronchiectasis, interstitial lung disease, pre-existing requirement for long term oxygen therapy. Do not include asthma.

#### Asthma (physician diagnosed)

Clinician-diagnosed asthma

### MODULE 1: PRESENTATION/ADMISSION CASE REPORT FORM

| PRE-ADMISSION MEDICATION <i>(taken within 14 days prior to admission/presentation at healthcare facility)</i> |                                                                                                                                                                         |
|---------------------------------------------------------------------------------------------------------------|-------------------------------------------------------------------------------------------------------------------------------------------------------------------------|
| Steroids                                                                                                      | <input type="radio"/> YES <input type="radio"/> NO <input type="radio"/> Unk If YES, <input type="radio"/> Oral <input type="radio"/> Inhaled <input type="radio"/> Unk |
| Other immunosuppressant agents (not oral steroids)                                                            | <input type="radio"/> YES <input type="radio"/> NO <input type="radio"/> Unk                                                                                            |
| Antibiotics                                                                                                   | <input type="radio"/> YES <input type="radio"/> NO <input type="radio"/> Unk If YES, agent(s): _____                                                                    |
| Antivirals                                                                                                    | <input type="radio"/> YES <input type="radio"/> NO <input type="radio"/> Unk If YES, agent(s): _____                                                                    |
| Other targeted COVID-19 Medications                                                                           | <input type="radio"/> YES <input type="radio"/> NO <input type="radio"/> Unk If YES, agent(s): _____                                                                    |

| CO-MORBIDITIES AND RISK FACTORS <i>(existing prior to admission and ongoing)</i> |                                                                                                                                                                                                                                                                                                                                                                                                                 |
|----------------------------------------------------------------------------------|-----------------------------------------------------------------------------------------------------------------------------------------------------------------------------------------------------------------------------------------------------------------------------------------------------------------------------------------------------------------------------------------------------------------|
| Chronic cardiac disease <i>(not hypertension)</i>                                | <input type="radio"/> YES <input type="radio"/> NO <input type="radio"/> Unk                                                                                                                                                                                                                                                                                                                                    |
| Hypertension                                                                     | Chronic hematologic disease <input type="radio"/> YES <input type="radio"/> NO <input type="radio"/> Unk<br>AIDS / HIV <input type="radio"/> YES-on ART <input type="radio"/> YES-not on ART <input type="radio"/> NO <input type="radio"/> Unk<br>If YES, most recent CD4 count:<br><input type="radio"/> < 200 <input type="radio"/> 200-< 500 <input type="radio"/> ≥ 500 cells/uL <input type="radio"/> Unk |
| Chronic pulmonary disease <i>(not asthma)</i>                                    | Diabetes Mellitus <input type="radio"/> YES-Type 1 <input type="radio"/> YES-Type 2<br><input type="radio"/> YES-Gestational <input type="radio"/> NO <input type="radio"/> Unk<br>If YES, HbA1C results (within last 6 months): _____<br>Units: <input type="radio"/> mmol/mol <input type="radio"/> mmol/L <input type="radio"/> %                                                                            |
| Asthma <i>(physician diagnosed)</i>                                              | Rheumatologic disorder <input type="radio"/> YES <input type="radio"/> NO <input type="radio"/> Unk                                                                                                                                                                                                                                                                                                             |
| Chronic kidney disease                                                           | Dementia <input type="radio"/> YES <input type="radio"/> NO <input type="radio"/> Unk                                                                                                                                                                                                                                                                                                                           |
| Obesity <i>(as defined by clinical staff)</i>                                    | Tuberculosis <input type="radio"/> YES <input type="radio"/> NO <input type="radio"/> Unk                                                                                                                                                                                                                                                                                                                       |
| Moderate or severe liver disease                                                 | Malnutrition <input type="radio"/> YES <input type="radio"/> NO <input type="radio"/> Unk                                                                                                                                                                                                                                                                                                                       |
| Mild liver disease                                                               | Smoking <input type="radio"/> YES <input type="radio"/> Never smoked <input type="radio"/> Former smoker <input type="radio"/> Unk                                                                                                                                                                                                                                                                              |
| Asplenia                                                                         | Other relevant risk factor(s) <input type="radio"/> YES <input type="radio"/> NO <input type="radio"/> Unk                                                                                                                                                                                                                                                                                                      |
| Chronic neurological disorder                                                    | If YES, specify:                                                                                                                                                                                                                                                                                                                                                                                                |
| Malignant neoplasm                                                               | <input type="radio"/> YES <input type="radio"/> NO <input type="radio"/> Unk                                                                                                                                                                                                                                                                                                                                    |

**CO-MORBIDITIES AND RISK FACTORS, continued**

**Chronic Kidney Disease**

Please include any of clinician-diagnosed chronic kidney disease, chronic estimated glomerular filtration rate < 60 mL/min/1.73m<sup>2</sup>, history of kidney transplantation

**Obesity (as defined by clinical staff)**

This refers to patients for whom an attending clinician has assessed them to be obese - ideally but not necessarily with an objective measurement of obesity, such as calculation of the body mass index (BMI of 30 or more) or measurement of abdominal girth.

**Moderate or severe liver disease**

This is defined as cirrhosis with portal hypertension, with or without bleeding or a history of variceal bleeding.

**Mild liver disease**

This is defined as cirrhosis without portal hypertension or chronic hepatitis

**Asplenia**

Please include any of splenectomy, non-functional spleen, and congenital asplenia.

**Chronic neurological disorder**

Please include any of cerebral palsy, multiple sclerosis, motor neurone disease, muscular dystrophy, myasthenia gravis, Parkinson’s disease, stroke, severe learning difficulty

**Malignant neoplasm**

Current solid organ or haematological malignancy. Please do not include malignancies that have been declared ‘cured’ ≥5 years ago with no evidence of ongoing disease. Do not include non-melanoma skin cancers. Do not include benign growths or dysplasia.

**Chronic hematologic disease**

Any long-term disorder of the red or white blood cells, platelets or coagulation system requiring regular or intermittent treatment. Do not include leukaemia, lymphoma or myeloma, which should be entered under malignancy. Do not include iron-deficiency anaemia which is explained by diet or chronic blood loss.

**AIDS/HIV**

History of laboratory-confirmed HIV infection. Indicate whether or not the patient is on ART (antiretroviral therapy). Please provide the most recent CD4 count, if available.

**Diabetes Mellitus**

Type 1 or Type 2 diabetes mellitus requiring oral or subcutaneous treatment. Please indicate whether Type 1 or Type 2. If HbA1c results are available from the last 6 months only, please provide the most recent value.

**MODULE 1: PRESENTATION/ADMISSION CASE REPORT FORM**

| PRE-ADMISSION MEDICATION (taken within 14 days prior to admission/presentation at healthcare facility) |                                                                                                                                                                         |
|--------------------------------------------------------------------------------------------------------|-------------------------------------------------------------------------------------------------------------------------------------------------------------------------|
| Steroids                                                                                               | <input type="radio"/> YES <input type="radio"/> NO <input type="radio"/> Unk If YES, <input type="radio"/> Oral <input type="radio"/> Inhaled <input type="radio"/> Unk |
| Other immunosuppressant agents (not oral steroids)                                                     | <input type="radio"/> YES <input type="radio"/> NO <input type="radio"/> Unk                                                                                            |
| Antibiotics                                                                                            | <input type="radio"/> YES <input type="radio"/> NO <input type="radio"/> Unk If YES, agent(s): _____                                                                    |
| Antivirals                                                                                             | <input type="radio"/> YES <input type="radio"/> NO <input type="radio"/> Unk If YES, agent(s): _____                                                                    |
| Other targeted COVID-19 Medications                                                                    | <input type="radio"/> YES <input type="radio"/> NO <input type="radio"/> Unk If YES, agent(s): _____                                                                    |

| CO-MORBIDITIES AND RISK FACTORS (existing prior to admission and ongoing) |                                                                                                                                                                                                                                                                                                                       |
|---------------------------------------------------------------------------|-----------------------------------------------------------------------------------------------------------------------------------------------------------------------------------------------------------------------------------------------------------------------------------------------------------------------|
| Chronic cardiac disease (not hypertension)                                | <input type="radio"/> YES <input type="radio"/> NO <input type="radio"/> Unk                                                                                                                                                                                                                                          |
| Hypertension                                                              | <input type="radio"/> YES <input type="radio"/> NO <input type="radio"/> Unk                                                                                                                                                                                                                                          |
| Chronic pulmonary disease (not asthma)                                    | <input type="radio"/> YES <input type="radio"/> NO <input type="radio"/> Unk                                                                                                                                                                                                                                          |
| Asthma (physician diagnosed)                                              | <input type="radio"/> YES <input type="radio"/> NO <input type="radio"/> Unk                                                                                                                                                                                                                                          |
| Chronic kidney disease                                                    | <input type="radio"/> YES <input type="radio"/> NO <input type="radio"/> Unk                                                                                                                                                                                                                                          |
| Obesity (as defined by clinical staff)                                    | <input type="radio"/> YES <input type="radio"/> NO <input type="radio"/> Unk                                                                                                                                                                                                                                          |
| Moderate or severe liver disease                                          | <input type="radio"/> YES <input type="radio"/> NO <input type="radio"/> Unk                                                                                                                                                                                                                                          |
| Mild liver disease                                                        | <input type="radio"/> YES <input type="radio"/> NO <input type="radio"/> Unk                                                                                                                                                                                                                                          |
| Asplenia                                                                  | <input type="radio"/> YES <input type="radio"/> NO <input type="radio"/> Unk                                                                                                                                                                                                                                          |
| Chronic neurological disorder                                             | <input type="radio"/> YES <input type="radio"/> NO <input type="radio"/> Unk                                                                                                                                                                                                                                          |
| Malignant neoplasm                                                        | <input type="radio"/> YES <input type="radio"/> NO <input type="radio"/> Unk                                                                                                                                                                                                                                          |
| Chronic hematologic disease                                               | <input type="radio"/> YES <input type="radio"/> NO <input type="radio"/> Unk                                                                                                                                                                                                                                          |
| AIDS / HIV                                                                | <input type="radio"/> YES-on ART <input type="radio"/> YES-not on ART <input type="radio"/> NO <input type="radio"/> Unk<br>If YES, most recent CD4 count:<br><input type="radio"/> < 200 <input type="radio"/> 200-< 500 <input type="radio"/> ≥ 500 cells/uL <input type="radio"/> Unk                              |
| Diabetes Mellitus                                                         | <input type="radio"/> YES-Type 1 <input type="radio"/> YES -Type 2<br><input type="radio"/> YES -Gestational <input type="radio"/> NO <input type="radio"/> Unk<br>If YES, HbA1C results (within last 6 months) : _____<br>Units: <input type="radio"/> mmol/mol <input type="radio"/> mmol/L <input type="radio"/> % |
| Rheumatologic disorder                                                    | <input type="radio"/> YES <input type="radio"/> NO <input type="radio"/> Unk                                                                                                                                                                                                                                          |
| Dementia                                                                  | <input type="radio"/> YES <input type="radio"/> NO <input type="radio"/> Unk                                                                                                                                                                                                                                          |
| Tuberculosis                                                              | <input type="radio"/> YES <input type="radio"/> NO <input type="radio"/> Unk                                                                                                                                                                                                                                          |
| Malnutrition                                                              | <input type="radio"/> YES <input type="radio"/> NO <input type="radio"/> Unk                                                                                                                                                                                                                                          |
| Smoking                                                                   | <input type="radio"/> YES <input type="radio"/> Never smoked <input type="radio"/> Former smoker <input type="radio"/> Unk                                                                                                                                                                                            |
| Other relevant risk factor(s)                                             | <input type="radio"/> YES <input type="radio"/> NO <input type="radio"/> Unk                                                                                                                                                                                                                                          |
| If YES, specify:                                                          |                                                                                                                                                                                                                                                                                                                       |

**CO-MORBIDITIES AND RISK FACTORS, continued**

**Rheumatologic disorder**

This is defined as an inflammatory and degenerative diseases of connective tissue structures. It includes chronic arthropathies and arthritis, connective tissue disorders and vasculitides.

**Dementia**

This is defined as clinical diagnosis of dementia

**Tuberculosis**

Patients currently receiving treatment for tuberculosis. Do not include latent tuberculosis.

**Malnutrition**

Any clinically identified deficiency in intake, either of total energy or of specific nutrients that led to a dietetic intervention or referral prior to the onset of COVID-19 symptoms. Do not include people who needed supplementary nutrition solely due to reduced intake during their current illness episode.

**Smoking**

Smoking at least one cigarette, cigar, pipe or equivalent per day before the onset of the current illness. Do not include smoke-free tobacco products such as chewed tobacco or electronic nicotine delivery devices.

**Other relevant risk factor** List any significant risk factors or comorbidities that existed prior to admission, are ongoing, that are not already listed.

**MODULE 1: PRESENTATION/ADMISSION CASE REPORT FORM**

| <b>PRE-ADMISSION MEDICATION</b> (taken within 14 days prior to admission/presentation at healthcare facility) |                                                                                                                                                                         |
|---------------------------------------------------------------------------------------------------------------|-------------------------------------------------------------------------------------------------------------------------------------------------------------------------|
| Steroids                                                                                                      | <input type="radio"/> YES <input type="radio"/> NO <input type="radio"/> Unk If YES, <input type="radio"/> Oral <input type="radio"/> Inhaled <input type="radio"/> Unk |
| Other immunosuppressant agents (not oral steroids)                                                            | <input type="radio"/> YES <input type="radio"/> NO <input type="radio"/> Unk                                                                                            |
| Antibiotics                                                                                                   | <input type="radio"/> YES <input type="radio"/> NO <input type="radio"/> Unk If YES, agent(s): _____                                                                    |
| Antivirals                                                                                                    | <input type="radio"/> YES <input type="radio"/> NO <input type="radio"/> Unk If YES, agent(s): _____                                                                    |
| Other targeted COVID-19 Medications                                                                           | <input type="radio"/> YES <input type="radio"/> NO <input type="radio"/> Unk If YES, agent(s): _____                                                                    |

| <b>CO-MORBIDITIES AND RISK FACTORS</b> (existing prior to admission and ongoing) |                                                                                                                                                                                                                                                                                                                                                                                                                                                                                                                                                                                                                                                                |
|----------------------------------------------------------------------------------|----------------------------------------------------------------------------------------------------------------------------------------------------------------------------------------------------------------------------------------------------------------------------------------------------------------------------------------------------------------------------------------------------------------------------------------------------------------------------------------------------------------------------------------------------------------------------------------------------------------------------------------------------------------|
| Chronic cardiac disease (not hypertension)                                       | <input type="radio"/> YES <input type="radio"/> NO <input type="radio"/> Unk                                                                                                                                                                                                                                                                                                                                                                                                                                                                                                                                                                                   |
| Hypertension                                                                     | <input type="radio"/> YES <input type="radio"/> NO <input type="radio"/> Unk<br>Chronic hematologic disease <input type="radio"/> YES <input type="radio"/> NO <input type="radio"/> Unk<br>AIDS / HIV <input type="radio"/> YES-on ART <input type="radio"/> YES-not on ART <input type="radio"/> NO <input type="radio"/> Unk<br>If YES, most recent CD4 count:<br><input type="radio"/> < 200 <input type="radio"/> 200-< 500 <input type="radio"/> ≥ 500 cells/uL <input type="radio"/> Unk                                                                                                                                                                |
| Chronic pulmonary disease (not asthma)                                           | <input type="radio"/> YES <input type="radio"/> NO <input type="radio"/> Unk<br>Diabetes Mellitus <input type="radio"/> YES-Type 1 <input type="radio"/> YES-Type 2<br><input type="radio"/> YES-Gestational <input type="radio"/> NO <input type="radio"/> Unk<br>If YES, HbA1C results (within last 6 months) : _____<br>Units: <input type="radio"/> mmol/mol <input type="radio"/> mmol/L <input type="radio"/> %                                                                                                                                                                                                                                          |
| Asthma (physician diagnosed)                                                     | <input type="radio"/> YES <input type="radio"/> NO <input type="radio"/> Unk                                                                                                                                                                                                                                                                                                                                                                                                                                                                                                                                                                                   |
| Chronic kidney disease                                                           | <input type="radio"/> YES <input type="radio"/> NO <input type="radio"/> Unk                                                                                                                                                                                                                                                                                                                                                                                                                                                                                                                                                                                   |
| Obesity (as defined by clinical staff)                                           | <input type="radio"/> YES <input type="radio"/> NO <input type="radio"/> Unk                                                                                                                                                                                                                                                                                                                                                                                                                                                                                                                                                                                   |
| Moderate or severe liver disease                                                 | <input type="radio"/> YES <input type="radio"/> NO <input type="radio"/> Unk                                                                                                                                                                                                                                                                                                                                                                                                                                                                                                                                                                                   |
| Mild liver disease                                                               | <input type="radio"/> YES <input type="radio"/> NO <input type="radio"/> Unk                                                                                                                                                                                                                                                                                                                                                                                                                                                                                                                                                                                   |
| Asplenia                                                                         | <input type="radio"/> YES <input type="radio"/> NO <input type="radio"/> Unk                                                                                                                                                                                                                                                                                                                                                                                                                                                                                                                                                                                   |
| Chronic neurological disorder                                                    | <input type="radio"/> YES <input type="radio"/> NO <input type="radio"/> Unk                                                                                                                                                                                                                                                                                                                                                                                                                                                                                                                                                                                   |
| Malignant neoplasm                                                               | <input type="radio"/> YES <input type="radio"/> NO <input type="radio"/> Unk                                                                                                                                                                                                                                                                                                                                                                                                                                                                                                                                                                                   |
|                                                                                  | Rheumatologic disorder <input type="radio"/> YES <input type="radio"/> NO <input type="radio"/> Unk<br>Dementia <input type="radio"/> YES <input type="radio"/> NO <input type="radio"/> Unk<br>Tuberculosis <input type="radio"/> YES <input type="radio"/> NO <input type="radio"/> Unk<br>Malnutrition <input type="radio"/> YES <input type="radio"/> NO <input type="radio"/> Unk<br>Smoking <input type="radio"/> YES <input type="radio"/> Never smoked <input type="radio"/> Former smoker <input type="radio"/> Unk<br>Other relevant risk factor(s) <input type="radio"/> YES <input type="radio"/> NO <input type="radio"/> Unk<br>If YES, specify: |



## MODULE 2 CASE REPORT FORM ON ADMISSION, CRITICAL CARE, RESEARCH SAMPLING

### SIGNS AND SYMPTOMS

#### Highest Temperature

Please enter the highest peripheral body temperature (rectal if < 3 months) recorded during the course of the day in the space provided and indicate the unit of measurement, either degrees Celsius (°C) or Fahrenheit (°F).

#### Heart rate (HR)

Enter the heart rate measured in beats per minute. This may be measured manually or by electronic monitoring.

#### Respiratory rate (RR)

Enter the respiratory rate in breaths per minute. Manual rather than electronic measurement is preferred where possible (this is achieved by counting the number of breaths for one minute, counting how many times the chest rises within this time period). If both abnormal low and high rate observed, record the abnormally high rate.

#### Systolic BP

Please report the systolic and diastolic blood pressure from the observation with the lowest mean arterial pressure (if mean arterial pressure has not been calculated, report the measurement with lowest systolic blood pressure).

Please enter the systolic blood pressure measured in millimetres of mercury (mmHg), in the relevant sections. For example, if the blood pressure is 120/85 mmHg, enter 120 in the section marked 'systolic BP'. Use any recognised method for measuring blood pressure.

#### Diastolic BP

Please enter the diastolic blood pressure measured in millimetres of mercury (mmHg), in the relevant sections. For example, if the blood pressure is 120/85 mmHg, enter 85 in the section marked 'diastolic BP'. Use any recognised method for measuring blood pressure.

#### Oxygen saturation SaO<sub>2</sub>

For all patients, irrespective of ventilation or supplemental oxygen requirement, please enter the percentage oxygen saturation. This may be measured by pulse oximetry or by arterial blood gas analysis.

#### Any supplemental oxygen: FiO<sub>2</sub> (0.21-1.0)

This is a key indicator to complete for all patients. If the patient received any form of supplemental oxygen through a mask or nasal cannula that delivers a known concentration of oxygen or is being ventilated, please provide the fraction of inspired oxygen (FiO<sub>2</sub>) delivered. For patients receiving oxygen through any means, such as a face mask or nasal cannula, that does not deliver a known oxygen concentration provide the maximum flow rate received on day of completion in L/min.

## MODULE 2: CASE REPORT FORM ON ADMISSION, CRITICAL CARE, RESEARCH SAMPLING

Complete on the day of admission or first COVID-19 investigation, and on the first day of ICU admission (if different from day of admission). In addition, complete for days when biochemical results are available.

| SIGNS AND SYMPTOMS (Record the worst value between 00:00 to 24:00 on day of assessment)(worst=furthest from normal range)                      |  |
|------------------------------------------------------------------------------------------------------------------------------------------------|--|
| DATE OF ASSESSMENT (DD/MM/YYYY): [D][D]/[M][M]/[Y][Y]                                                                                          |  |
| Highest temperature: [ ][ ][ ][ ] °C or [ ][ ][ ] °F HR: [ ][ ][ ] beats/minute RR: [ ][ ][ ] breaths/minute                                   |  |
| Systolic BP: [ ][ ][ ] mmHg Diastolic BP: [ ][ ][ ] mmHg                                                                                       |  |
| Oxygen saturation SaO <sub>2</sub> [ ][ ][ ] %                                                                                                 |  |
| Any supplemental oxygen: YES NO Unknown If yes,                                                                                                |  |
| FiO <sub>2</sub> (0.21-1.0) [ ][ ][ ] or [ ][ ][ ] % or [ ][ ][ ] L/min (Highest L/min)                                                        |  |
| PaO <sub>2</sub> (at time nearest to the FiO <sub>2</sub> recorded at top of page) [ ][ ][ ] kPa or [ ][ ][ ] mmHg Not done                    |  |
| PaO <sub>2</sub> sample type: Arterial Capillary Venous Unknown                                                                                |  |
| From same blood gas record as PaO <sub>2</sub> :                                                                                               |  |
| PCO <sub>2</sub> [ ][ ][ ] kPa or [ ][ ][ ] mmHg   pH [ ][ ][ ]   HCO <sub>3</sub> <sup>-</sup> [ ][ ][ ] mEq/L   Base excess [ ][ ][ ] mmol/L |  |
| Sternal capillary refill time >2seconds YES NO Unknown                                                                                         |  |
| AVPU: Alert [ ][ ] Verbal [ ][ ] Pain [ ][ ] Unresponsive [ ][ ] Glasgow Coma Score (GCS / 15) [ ][ ][ ]                                       |  |
| Richmond Agitation-Sedation Scale (RASS) [ ][ ]                                                                                                |  |
| Mean Arterial Blood Pressure [ ][ ][ ][ ] mmHg Unknown                                                                                         |  |
| Urine flow rate [ ][ ][ ][ ][ ] mL/24 hours Check if estimated Unknown                                                                         |  |
| Is the patient currently receiving, or has received (between 00:00 to 24:00 on day of assessment)                                              |  |
| Current admission to ICU/ITU/IMC/HDU? YES NO Unknown                                                                                           |  |
| High-flow nasal cannula oxygen therapy? YES NO Unknown                                                                                         |  |
| Non-invasive ventilation (Any)? YES NO Unknown If YES: OBIPAP OCPAP Other Unknown                                                              |  |
| Invasive ventilation? YES NO Unknown                                                                                                           |  |
| Prone positioning? YES NO Unknown If yes, Oduring invasive ventilation Owhilst self-ventilating Unknown                                        |  |
| Inhaled Nitric Oxide? YES NO Unknown                                                                                                           |  |
| Tracheostomy inserted? YES NO Unknown                                                                                                          |  |
| Extra corporeal life support (ECLS/ ECMO)? YES NO Unknown If YES: OVV OAV OCentral Unknown                                                     |  |
| Renal replacement therapy (RRT) or dialysis? YES NO Unknown                                                                                    |  |
| Any vasopressor/inotropic support? YES NO Unknown (if NO, select NO for the next 3 questions)                                                  |  |
| Dopamine <5µg/kg/min OR Dobutamine OR milrinone OR levosimendan: YES NO                                                                        |  |
| Dopamine 5-15µg/kg/min OR Epinephrine/Norepinephrine < 0.1µg/kg/min OR vasopressin OR phenylephrine: YES NO                                    |  |
| Dopamine >15µg/kg/min OR Epinephrine/Norepinephrine > 0.1µg/kg/min: YES NO                                                                     |  |
| Neuromuscular blocking agents? YES NO Unknown                                                                                                  |  |
| Other intervention(s) or procedure(s)? YES NO Unknown If YES, Specify: _____                                                                   |  |

**SIGNS AND SYMPTOMS, continued**
**PaO<sub>2</sub> (at time nearest to the FiO<sub>2</sub> recorded at top of page)**

PaO<sub>2</sub> (partial pressure of oxygen in blood) as determined by arterial/ capillary blood gas analysis. This PaO<sub>2</sub> must correspond with the oxygen therapy documented in the FiO<sub>2</sub> field. Please fill in the lowest value in either mmHg or kPa depending on the output of your blood gas analyser. If the PaO<sub>2</sub> is not known, place NA in the data field.

**From the same blood gas record as PaO<sub>2</sub>:**

PaCO<sub>2</sub> is the partial pressure of carbon dioxide measured in the sample. pH is the measure of the activity of the (solvated) hydrogen ion (H<sup>+</sup>) measured in the sample. HCO<sub>3</sub><sup>-</sup> refers to the bicarbonate measured in the blood gas sample. Base excess refers to standardised base excess (SBE). If standardised base excess is not reported, enter the base excess value presented, this can be either a positive or negative value.

**Sternal capillary refill time > 2 seconds?**

Sternal capillary refill time is measured by pressing on the sternum for five seconds with a finger or thumb until the underlying skin turns white and then noting the time in seconds needed for the colour to return once the pressure is released.

**AVPU**

Alert – responding to voice – responding to pain – unresponsive: please state the least responsive condition of the patient during the calendar day (not counting normal sleep). On day of admission record the value as close to admission as possible before treatments have been administered. For daily records, if the patient is being sedated on the day of assessment record the value before the sedation.

**Glasgow Coma Score (GCS / 15)**

Please state the lowest GCS recorded. For intubated patients and patients with a non-fenestrated tracheostomy, give 1 point for the voice component and calculate the total as usual. Suffixes such as t for tracheostomy cannot be entered on to the database. If the patient is sedated on the day of assessment these parameters should correspond to the values observed before sedation. For daily recording, if the patient is fully sedated for the duration of the day of assessment (from 00:00 to 24:00) record non testable. Glasgow Coma Score: <https://www.glasgowcomascale.org/downloads/GCS-Assessment-Aid-English.pdf?v=3>

**Richmond Agitation-Sedation Scale (RASS)**

RASS – If done, enter the lowest calculated value (between -5 and 4) on the date of assessment.

**Current admission to ICU/ITU/IMC/HDU?**

If the patient has been admitted to an intensive care, intensive therapy, intermediate care or high dependency unit please tick 'yes'. If the patient is on a general care ward then select 'no' or 'Unknown'.

See Outcome Case Report Form (below) for guidelines on recording treatment data

**MODULE 2: CASE REPORT FORM ON ADMISSION, CRITICAL CARE, RESEARCH SAMPLING**

Complete on the day of admission or first COVID-19 investigation, and on the first day of ICU admission (if different from day of admission). In addition, complete for days when biochemical results are available.

| SIGNS AND SYMPTOMS (Record the worst value between 00:00 to 24:00 on day of assessment)(worst=furthest from normal range)                      |  |
|------------------------------------------------------------------------------------------------------------------------------------------------|--|
| DATE OF ASSESSMENT (DD/MM/YYYY): [D][D]/[M][M]/[Y][Y]                                                                                          |  |
| Highest temperature: [ ][ ][ ] °C or [ ][ ][ ] °F HR: [ ][ ][ ] beats/minute RR: [ ][ ][ ] breaths/minute                                      |  |
| Systolic BP: [ ][ ][ ] mmHg Diastolic BP: [ ][ ][ ] mmHg                                                                                       |  |
| Oxygen saturation SaO <sub>2</sub> [ ][ ][ ] %                                                                                                 |  |
| Any supplemental oxygen: YES NO Unknown If yes,                                                                                                |  |
| FiO <sub>2</sub> (0.21-1.0) [ ][ ][ ] or [ ][ ][ ] % or [ ][ ][ ] L/min (Highest L/min)                                                        |  |
| PaO <sub>2</sub> (at time nearest to the FiO <sub>2</sub> recorded at top of page) [ ][ ][ ] kPa or [ ][ ][ ] mmHg Not done                    |  |
| PaO <sub>2</sub> sample type: Arterial Capillary Venous Unknown                                                                                |  |
| From same blood gas record as PaO <sub>2</sub> :                                                                                               |  |
| PCO <sub>2</sub> [ ][ ][ ] kPa or [ ][ ][ ] mmHg   pH [ ][ ][ ]   HCO <sub>3</sub> <sup>-</sup> [ ][ ][ ] mEq/L   Base excess [ ][ ][ ] mmol/L |  |
| Sternal capillary refill time >2seconds YES NO Unknown                                                                                         |  |
| AVPU: Alert [ ][ ] Verbal [ ][ ] Pain [ ][ ] Unresponsive [ ][ ] Glasgow Coma Score (GCS / 15) [ ][ ][ ]                                       |  |
| Richmond Agitation-Sedation Scale (RASS) [ ][ ]                                                                                                |  |
| Mean Arterial Blood Pressure [ ][ ][ ] mmHg Unknown                                                                                            |  |
| Urine flow rate [ ][ ][ ][ ][ ] mL/24 hours Check if estimated Unknown                                                                         |  |

**Is the patient currently receiving, or has received (between 00:00 to 24:00 on day of assessment)**

|                                                                                                      |                                                                                      |
|------------------------------------------------------------------------------------------------------|--------------------------------------------------------------------------------------|
| Current admission to ICU/ITU/IMC/HDU?                                                                | YES NO Unknown                                                                       |
| High-flow nasal cannula oxygen therapy? !                                                            | YES NO Unknown                                                                       |
| Non-invasive ventilation (Any)?                                                                      | YES NO Unknown If YES: OBIPAP OCPAP Other Unknown                                    |
| Invasive ventilation?                                                                                | YES NO Unknown                                                                       |
| Prone positioning?                                                                                   | YES NO Unknown If yes, Oduring invasive ventilation Owhilst self-ventilating Unknown |
| Inhaled Nitric Oxide?                                                                                | YES NO Unknown                                                                       |
| Tracheostomy inserted?                                                                               | YES NO Unknown                                                                       |
| Extra corporeal life support (ECLS/ ECMO)?                                                           | YES NO Unknown If YES: OVV OAV OCentral Unknown                                      |
| Renal replacement therapy (RRT) or dialysis?                                                         | YES NO Unknown                                                                       |
| Any vasopressor/inotropic support?                                                                   | YES NO Unknown (if NO, select NO for the next 3 questions)                           |
| Dopamine <5µg/kg/min OR Dobutamine OR milrinone OR levosimendan:                                     | YES NO                                                                               |
| Dopamine 5-15µg/kg/min OR Epinephrine/Norepinephrine < 0.1µg/kg/min OR vasopressin OR phenylephrine: | YES NO                                                                               |
| Dopamine >15µg/k/min OR Epinephrine/Norepinephrine > 0.1µg/kg/min:                                   | YES NO                                                                               |
| Neuromuscular blocking agents?                                                                       | YES NO Unknown                                                                       |
| Other intervention(s) or procedure(s)?                                                               | YES NO Unknown If YES, Specify: _____                                                |

### LABORATORY RESULTS

Please record all laboratory results available on day of admission, or the day that COVID-19 was first clinically suspected in patients already admitted to hospital, and on day of admission to ICU/HDU. For daily records: record the date of assessment as the day the blood sample/s were taken.. If the unit of measurement is not shown on the paper form it will likely appear in the dropdown list in the eCRF. If you cannot find the correct unit on the eCRF please use a unit converter, such as: <http://unitslab.com/> or equivalent or email [ncov@isaric.org](mailto:ncov@isaric.org) to let us know. 'Worst value' refers to values furthest from the normal physiological range or laboratory normal range. Results that were rejected by the clinical team (e.g. haemolysed blood samples, contaminated microbiology results) should not be reported.

**Haemoglobin (Hb or Hgb)** refers to haemoglobin concentration measurement in blood.

**WBC count** is the total white blood cell count in blood.

**Haematocrit (Ht or HCT)**, also known as packed cell volume (PCV) or erythrocyte volume fraction (EVF), is the volume percentage (%) of red blood cells in blood.

**APTT** is the activated partial thromboplastin time. Record the highest value.

**APTR** is the activated partial thromboplastin ratio. Record the highest value.

**PT** is the prothrombin time. Record the highest value.

**INR** is the international normalised ratio. Record the highest value.

**ALT/SGPT:** ALT is alanine transaminase (also called serum glutamic pyruvate transaminase, SGPT). Record the highest value.

**Total Bilirubin** refers to total bilirubin measured in the blood. Record the highest value.

**AST/SGOT** is aspartate transaminase (also called serum glutamic oxaloacetic transaminase, SGOT). Record the highest value.

**Glucose** refers to blood glucose test. Random glucose measurement is preferred to a fasted measurement.

**Blood urea nitrogen** is also known as 'urea', measured in a blood sample. Record the highest value.

**Lactate** refers to blood lactate. Record the highest value.

**Creatinine** refers to serum creatinine. Record the highest value.

**Procalcitonin** or PCT refers to blood procalcitonin. Record the highest value.

**CRP** is C-reactive protein and refers to the blood (serum or plasma) CRP level. Record the highest value.

**LDH** is lactate dehydrogenase. Record the highest value.

**Creatine kinase (CK, or creatine phosphokinase, CPK)** refers to total creatine kinase measured in the blood. Record the highest value.

**Troponin I** Record the highest value

**D-dimer** Record the highest value

**Ferritin** Record the highest value

**IL-6** is Interleukin 6. Record the highest value

### MODULE 2: CASE REPORT FORM ON ADMISSION, CRITICAL CARE, RESEARCH SAMPLING

*Complete on the day of admission or first COVID-19 investigation, and on the first day of ICU admission (if different from day of admission). In addition, complete for days when biochemical results are available.*

| LABORATORY RESULTS (on admission, on any admission to ICU, then daily) – complete every line      |        |                       |                       |        |                       |
|---------------------------------------------------------------------------------------------------|--------|-----------------------|-----------------------|--------|-----------------------|
| DATE OF ASSESSMENT (DD/MM/YYYY): [D][D]/[M][M]/[2][0][Y][Y]                                       |        |                       |                       |        |                       |
| LABORATORY RESULTS (*record units if different from those listed)                                 |        |                       |                       |        |                       |
| Record the worst value between 00:00 to 24:00 on day of assessment (if Not Available write 'N/A') |        |                       |                       |        |                       |
| Parameter                                                                                         | Value* | Not done              | Parameter             | Value* | Not done              |
| Haemoglobin (g/L)                                                                                 |        | <input type="radio"/> | Urea (BUN) (mmol/L)   |        | <input type="radio"/> |
| WBC count (x10 <sup>9</sup> /L)                                                                   |        | <input type="radio"/> | Lactate (mmol/L)      |        | <input type="radio"/> |
| Lymphocyte count (10 <sup>9</sup> /L)                                                             |        | <input type="radio"/> | Creatinine (µmol/L)   |        | <input type="radio"/> |
| Neutrophil count (10 <sup>9</sup> /L)                                                             |        | <input type="radio"/> | Sodium (mmol/L)       |        | <input type="radio"/> |
| Haematocrit (%)                                                                                   |        | <input type="radio"/> | Potassium (mmol/L)    |        | <input type="radio"/> |
| Platelets (x10 <sup>9</sup> /L)                                                                   |        | <input type="radio"/> | Procalcitonin (ng/mL) |        | <input type="radio"/> |
| APTT (seconds)                                                                                    |        | <input type="radio"/> | CRP (mg/L)            |        | <input type="radio"/> |
| APTR                                                                                              |        | <input type="radio"/> | LDH (U/L)             |        | <input type="radio"/> |
| PT (seconds)                                                                                      |        | <input type="radio"/> | Creatine kinase (U/L) |        | <input type="radio"/> |
| INR                                                                                               |        | <input type="radio"/> | Troponin I (ng/mL)    |        | <input type="radio"/> |
| ALT/SGPT (U/L)                                                                                    |        | <input type="radio"/> | D-dimer (mg/L)        |        | <input type="radio"/> |
| Total bilirubin (µmol/L)                                                                          |        | <input type="radio"/> | Ferritin (ng/mL)      |        | <input type="radio"/> |
| AST/SGOT (U/L)                                                                                    |        | <input type="radio"/> | IL-6 (pg/mL)          |        | <input type="radio"/> |
| Glucose (mmol/L)                                                                                  |        | <input type="radio"/> | Fibrinogen (mg/dl)    |        | <input type="radio"/> |

### MODULE 3: OUTCOME CASE REPORT FORM

| TREATMENT: At ANY time during hospitalisation, did the patient receive/undergo:                                                                                                                       |                                                                 |
|-------------------------------------------------------------------------------------------------------------------------------------------------------------------------------------------------------|-----------------------------------------------------------------|
| Any Oxygen therapy? <input type="radio"/> YES <input type="radio"/> NO <input type="radio"/> Unknown                                                                                                  | If YES, total duration: _____days <input type="radio"/> Unknown |
| Maximum O <sub>2</sub> flow volume: <input type="radio"/> <2 L/min <input type="radio"/> 2-5 L/min <input type="radio"/> 6-10 L/min <input type="radio"/> 11-15 L/min <input type="radio"/> >15 L/min |                                                                 |
| Non-invasive ventilation? (Any) <input type="radio"/> YES <input type="radio"/> NO <input type="radio"/> Unknown                                                                                      | If YES, total duration: _____days <input type="radio"/> Unknown |
| Invasive ventilation? (Any) <input type="radio"/> YES <input type="radio"/> NO <input type="radio"/> Unknown                                                                                          | If YES, total duration: _____days <input type="radio"/> Unknown |
| High flow nasal oxygen <input type="radio"/> YES <input type="radio"/> NO <input type="radio"/> Unknown                                                                                               | If YES, total duration: _____days <input type="radio"/> Unknown |
| Prone Positioning? <input type="radio"/> YES <input type="radio"/> NO <input type="radio"/> Unknown                                                                                                   |                                                                 |
| Inhaled Nitric Oxide? <input type="radio"/> YES <input type="radio"/> NO <input type="radio"/> Unknown                                                                                                |                                                                 |
| Tracheostomy inserted? <input type="radio"/> YES <input type="radio"/> NO <input type="radio"/> Unknown                                                                                               |                                                                 |
| Extracorporeal support (ECMO)? <input type="radio"/> YES <input type="radio"/> NO <input type="radio"/> Unknown                                                                                       | If YES, total duration: _____days <input type="radio"/> Unknown |
| Renal replacement therapy (RRT) or dialysis? <input type="radio"/> YES <input type="radio"/> NO <input type="radio"/> Unknown                                                                         |                                                                 |
| Inotropes/vasopressors? <input type="radio"/> YES <input type="radio"/> NO <input type="radio"/> Unknown                                                                                              |                                                                 |
| ICU or High Dependency Unit admission? <input type="radio"/> YES <input type="radio"/> NO <input type="radio"/> Unknown                                                                               | If YES, total duration: _____days <input type="radio"/> Unknown |
| If YES, date of ICU admission: [D][D]/[M][M]/[2][0][Y][Y] <input type="radio"/> Unknown                                                                                                               |                                                                 |
| date of ICU discharge: [D][D]/[M][M]/[2][0][Y][Y] <input type="radio"/> Unknown                                                                                                                       |                                                                 |

### MODULE 3: OUTCOME CASE REPORT FORM

#### TREATMENT

For all questions of duration, please count the number of calendar days that the patient received the treatment. For treatments that were stopped and restarted, count those days on which the treatment was given but don't count any calendar days on which it was not given at all.

#### Oxygen therapy

Complete this field for all patients. If the patient received any form of supplementary oxygen, via nose cannula, mask or non-invasive or invasive ventilation tick 'yes' and indicate the total days they received any form of oxygen (O<sub>2</sub>) therapy.

If any supplemental oxygen (at any concentration) was given by any means of delivery **at any point** during the patient's hospital stay, place a cross in the box marked 'yes'. This includes any supplementary oxygen (O<sub>2</sub>) delivered via non-invasive facemasks/nasal cannula/mask or via invasive mechanical ventilation. Please also indicate the maximum O<sub>2</sub> flow volume. If it is not possible to access record of the absolute highest O<sub>2</sub> volume delivered during the admission indicate the highest known.

#### Non-invasive ventilation (Any)

If the patient received non-invasive ventilation (NIV), defined as the provision of ventilatory support through the patient's upper airway using a mask or similar device, at any time during their hospital stay, place tick 'yes' and enter the total duration in days if known.

#### Invasive ventilation (Any)

Invasive ventilation means that patient has undergone tracheal intubation, for the purpose of invasive mechanical ventilation. Invasive ventilation is a method to mechanically assist or replace spontaneous breathing in patients by use of a powered device that forces oxygenated air into the lungs. The mode of intubation may be orotracheal, nasotracheal, or via a cricothyrotomy or tracheotomy.

#### Prone Positioning

Prone ventilation refers to ventilation with the patient lying in the prone position. If the patient received prone ventilation at any time during their hospital stay, please tick 'yes' and indicate the total duration in days.

#### Renal replacement therapy (RRT) or dialysis

Renal replacement therapy includes haemodialysis, peritoneal dialysis (PD), intermittent haemodialysis (IHD), on-line intermittent haemofiltration (IHF), on-line haemodiafiltration (IHDF), continuous haemofiltration (CHF) and continuous haemodiafiltration (CHDF), continuous venovenous haemofiltration (CVVH), continuous venovenous haemodialysis (CVVHD), continuous venovenous haemodiafiltration (CVVHDF), slow continuous ultrafiltration (SCUF), continuous arteriovenous haemofiltration (CAVHD), sustained low-efficiency dialysis (SLED) and continuous renal replacement therapy (CRRT)

#### Inotropes/vasopressors?

A vasopressor is a pharmaceutical agent that causes vasoconstriction. Agents include norepinephrine, epinephrine, vasopressin, terlipressin and phenylephrine. An inotrope is a pharmaceutical agent that alters the force of myocardial contractility. Commonly used 'positive' inotropes include dobutamine, dopamine, milrinone and adrenaline (epinephrine). If the patient received a vasopressor or inotrope for at least one hour during their hospital stay, place tick 'yes' and the total duration in days if known.

### MODULE 2: CASE REPORT FORM ON ADMISSION, CRITICAL CARE, RESEARCH SAMPLING

Complete on the day of admission or first COVID-19 investigation, and on the first day of ICU admission (if different from day of admission). In addition, complete for days when biochemical results are available.

| LABORATORY RESULTS (on admission, on any admission to ICU, then daily) – complete every line      |        |                       |                       |        |                       |
|---------------------------------------------------------------------------------------------------|--------|-----------------------|-----------------------|--------|-----------------------|
| DATE OF ASSESSMENT (DD/MM/YYYY): [D][D]/[M][M]/[2][0][Y][Y]                                       |        |                       |                       |        |                       |
| LABORATORY RESULTS (*record units if different from those listed)                                 |        |                       |                       |        |                       |
| Record the worst value between 00:00 to 24:00 on day of assessment (if Not Available write 'N/A') |        |                       |                       |        |                       |
| Parameter                                                                                         | Value* | Not done              | Parameter             | Value* | Not done              |
| Haemoglobin (g/L)                                                                                 |        | <input type="radio"/> | Urea (BUN) (mmol/L)   |        | <input type="radio"/> |
| WBC count (x10 <sup>9</sup> /L)                                                                   |        | <input type="radio"/> | Lactate (mmol/L)      |        | <input type="radio"/> |
| Lymphocyte count (10 <sup>9</sup> /L)                                                             |        | <input type="radio"/> | Creatinine (µmol/L)   |        | <input type="radio"/> |
| Neutrophil count (10 <sup>9</sup> /L)                                                             |        | <input type="radio"/> | Sodium (mmol/L)       |        | <input type="radio"/> |
| Haematocrit (%)                                                                                   |        | <input type="radio"/> | Potassium (mmol/L)    |        | <input type="radio"/> |
| Platelets (x10 <sup>9</sup> /L)                                                                   |        | <input type="radio"/> | Procalcitonin (ng/mL) |        | <input type="radio"/> |
| APTT (seconds)                                                                                    |        | <input type="radio"/> | CRP (mg/L)            |        | <input type="radio"/> |
| APTR                                                                                              |        | <input type="radio"/> | LDH (U/L)             |        | <input type="radio"/> |
| PT (seconds)                                                                                      |        | <input type="radio"/> | Creatine kinase (U/L) |        | <input type="radio"/> |
| INR                                                                                               |        | <input type="radio"/> | Troponin I (ng/mL)    |        | <input type="radio"/> |
| ALT/SGPT (U/L)                                                                                    |        | <input type="radio"/> | D-dimer (mg/L)        |        | <input type="radio"/> |
| Total bilirubin (µmol/L)                                                                          |        | <input type="radio"/> | Ferritin (ng/mL)      |        | <input type="radio"/> |
| AST/SGOT (U/L)                                                                                    |        | <input type="radio"/> | IL-6 (pg/mL)          |        | <input type="radio"/> |
| Glucose (mmol/L)                                                                                  |        | <input type="radio"/> | Fibrinogen (mg/dl)    |        | <input type="radio"/> |

### MODULE 3: OUTCOME CASE REPORT FORM

| TREATMENT: At ANY time during hospitalisation, did the patient receive/undergo:                                                                                                                       |                                                                 |
|-------------------------------------------------------------------------------------------------------------------------------------------------------------------------------------------------------|-----------------------------------------------------------------|
| Any Oxygen therapy? <input type="radio"/> YES <input type="radio"/> NO <input type="radio"/> Unknown                                                                                                  | If YES, total duration: _____days <input type="radio"/> Unknown |
| Maximum O <sub>2</sub> flow volume: <input type="radio"/> <2 L/min <input type="radio"/> 2-5 L/min <input type="radio"/> 6-10 L/min <input type="radio"/> 11-15 L/min <input type="radio"/> >15 L/min |                                                                 |
| Non-invasive ventilation? (Any) <input type="radio"/> YES <input type="radio"/> NO <input type="radio"/> Unknown                                                                                      | If YES, total duration: _____days <input type="radio"/> Unknown |
| Invasive ventilation? (Any) <input type="radio"/> YES <input type="radio"/> NO <input type="radio"/> Unknown                                                                                          | If YES, total duration: _____days <input type="radio"/> Unknown |
| High flow nasal oxygen <input type="radio"/> YES <input type="radio"/> NO <input type="radio"/> Unknown                                                                                               | If YES, total duration: _____days <input type="radio"/> Unknown |
| Prone Positioning? <input type="radio"/> YES <input type="radio"/> NO <input type="radio"/> Unknown                                                                                                   |                                                                 |
| Inhaled Nitric Oxide? <input type="radio"/> YES <input type="radio"/> NO <input type="radio"/> Unknown                                                                                                |                                                                 |
| Tracheostomy inserted? <input type="radio"/> YES <input type="radio"/> NO <input type="radio"/> Unknown                                                                                               |                                                                 |
| Extracorporeal support (ECMO)? <input type="radio"/> YES <input type="radio"/> NO <input type="radio"/> Unknown                                                                                       | If YES, total duration: _____days <input type="radio"/> Unknown |
| Renal replacement therapy (RRT) or dialysis? <input type="radio"/> YES <input type="radio"/> NO <input type="radio"/> Unknown                                                                         |                                                                 |
| Inotropes/vasopressors? <input type="radio"/> YES <input type="radio"/> NO <input type="radio"/> Unknown                                                                                              |                                                                 |
| ICU or High Dependency Unit admission? <input type="radio"/> YES <input type="radio"/> NO <input type="radio"/> Unknown                                                                               | If YES, total duration: _____days <input type="radio"/> Unknown |
| If YES, date of ICU admission: [D][D]/[M][M]/[2][0][Y][Y] <input type="radio"/> Unknown                                                                                                               |                                                                 |
| date of ICU discharge: [D][D]/[M][M]/[2][0][Y][Y] <input type="radio"/> Unknown                                                                                                                       |                                                                 |

**COMPLICATIONS**

Please select all that were clinically identified at any time during the hospital admission. Do not include known comorbidities (e.g. previous atrial fibrillation should not be included but new onset during this admission should). Record physician diagnosed complications.

**Viral pneumonitis/pneumonia**

Clinically or radiologically diagnosed viral pneumonitis/pneumonia.

**Bacterial pneumonia**

Clinically or radiologically diagnosed bacterial pneumonia (including community, hospital and ventilator acquired) managed with antimicrobials. Bacteriological confirmation not required.

**Acute Respiratory Distress Syndrome (ARDS)**

Defined according to Berlin criteria as:

- Occurring within 1 week of a known clinical insult or worsening respiratory symptoms
- Bilateral radiological opacities not fully explained by effusions, lobar/lung collapse, or nodules
- Respiratory failure not fully explained by cardiac failure or fluid overload

**Pneumothorax**

Is defined as the abnormal presence of air in the pleural cavity (between the lungs and the chest wall), causing collapse of the lung. It may be diagnosed clinically, usually with radiological confirmation.

**Pleural effusion**

Is defined as increased amounts of fluid within the pleural cavity. It may be diagnosed clinically, with or without radiological or interventional confirmation.

**Cryptogenic organizing pneumonia (COP)**

Idiopathic diffuse interstitial lung disease, diagnosed radiologically (multiple consolidative or ground glass opacities) or histologically (granulation tissue and chronic inflammatory infiltrate in alveoli). Formerly known as bronchiolitis obliterans organizing pneumonia (BOOP)

**Bronchiolitis**

This is a clinical diagnosis.

**Cardiac arrest**

Sudden cessation of cardiac activity with no normal breathing and no signs of circulation.

**Myocardial infarction**

Myocardial ischaemia (MI) leading to injury/necrosis, diagnosed by clinical findings, altered electrocardiography and elevated cardiac enzymes.

**Cardiac ischaemia**

Is defined as diminished blood and oxygen supply to the heart muscle, also known as myocardial ischemia, It is confirmed by an electrocardiogram (showing ischaemic changes, e.g. ST depression or elevation) and/or cardiac enzyme elevation.

**Cardiac arrhythmia**

If a cardiac arrhythmia is identified and there is no previous record of it, select 'yes'.

**Myocarditis / Pericarditis**

Myocarditis / pericarditis refers to an inflammation of the heart or pericardium (outer lining of the heart). Diagnosis can be clinical, biochemical (cardiac enzymes) or radiological

**MODULE 3: OUTCOME CASE REPORT FORM**

| COMPLICATIONS: At any time during hospitalisation did the patient experience: (Unk = Unknown) |                                                                              |                                         |                                                                              |
|-----------------------------------------------------------------------------------------------|------------------------------------------------------------------------------|-----------------------------------------|------------------------------------------------------------------------------|
| Viral pneumonia/pneumonitis                                                                   | <input type="radio"/> YES <input type="radio"/> NO <input type="radio"/> Unk | Meningitis / Encephalitis               | <input type="radio"/> YES <input type="radio"/> NO <input type="radio"/> Unk |
| Bacterial pneumonia                                                                           | <input type="radio"/> YES <input type="radio"/> NO <input type="radio"/> Unk | Bacteremia                              | <input type="radio"/> YES <input type="radio"/> NO <input type="radio"/> Unk |
| Acute Respiratory Distress Syndrome                                                           | <input type="radio"/> YES <input type="radio"/> NO <input type="radio"/> Unk | Coagulation disorder / DIC              | <input type="radio"/> YES <input type="radio"/> NO <input type="radio"/> Unk |
| Pneumothorax                                                                                  | <input type="radio"/> YES <input type="radio"/> NO <input type="radio"/> Unk | Pulmonary Embolism                      | <input type="radio"/> YES <input type="radio"/> NO <input type="radio"/> Unk |
| Pleural effusion                                                                              | <input type="radio"/> YES <input type="radio"/> NO <input type="radio"/> Unk | Deep Vein Thrombosis                    | <input type="radio"/> YES <input type="radio"/> NO <input type="radio"/> Unk |
| Cryptogenic organizing pneumonia (COP)                                                        | <input type="radio"/> YES <input type="radio"/> NO <input type="radio"/> Unk | Other thromboembolism (not PE or DVT)   | <input type="radio"/> YES <input type="radio"/> NO <input type="radio"/> Unk |
| Bronchiolitis                                                                                 | <input type="radio"/> YES <input type="radio"/> NO <input type="radio"/> Unk | Anemia                                  | <input type="radio"/> YES <input type="radio"/> NO <input type="radio"/> Unk |
| Cardiac arrest                                                                                | <input type="radio"/> YES <input type="radio"/> NO <input type="radio"/> Unk | Rhabdomyolysis / Myositis               | <input type="radio"/> YES <input type="radio"/> NO <input type="radio"/> Unk |
| Myocardial infarction                                                                         | <input type="radio"/> YES <input type="radio"/> NO <input type="radio"/> Unk | Acute renal injury/ Acute renal failure | <input type="radio"/> YES <input type="radio"/> NO <input type="radio"/> Unk |
| Cardiac ischaemia                                                                             | <input type="radio"/> YES <input type="radio"/> NO <input type="radio"/> Unk | Gastrointestinal haemorrhage            | <input type="radio"/> YES <input type="radio"/> NO <input type="radio"/> Unk |
| Cardiac arrhythmia                                                                            | <input type="radio"/> YES <input type="radio"/> NO <input type="radio"/> Unk | Pancreatitis                            | <input type="radio"/> YES <input type="radio"/> NO <input type="radio"/> Unk |
| Myocarditis / Pericarditis                                                                    | <input type="radio"/> YES <input type="radio"/> NO <input type="radio"/> Unk | Liver dysfunction                       | <input type="radio"/> YES <input type="radio"/> NO <input type="radio"/> Unk |
| Endocarditis                                                                                  | <input type="radio"/> YES <input type="radio"/> NO <input type="radio"/> Unk | Hyperglycemia                           | <input type="radio"/> YES <input type="radio"/> NO <input type="radio"/> Unk |
| Cardiomyopathy                                                                                | <input type="radio"/> YES <input type="radio"/> NO <input type="radio"/> Unk | Hypoglycemia                            | <input type="radio"/> YES <input type="radio"/> NO <input type="radio"/> Unk |
| Congestive heart failure                                                                      | <input type="radio"/> YES <input type="radio"/> NO <input type="radio"/> Unk | Other                                   | <input type="radio"/> YES <input type="radio"/> NO <input type="radio"/> Unk |
| Seizure                                                                                       | <input type="radio"/> YES <input type="radio"/> NO <input type="radio"/> Unk | If YES, specify: _____                  |                                                                              |
| Stroke / Cerebrovascular accident                                                             | <input type="radio"/> YES <input type="radio"/> NO <input type="radio"/> Unk |                                         |                                                                              |

**DIAGNOSTICS**

**Section 1: RESPIRATORY VIRUS PCR TESTING**

SARS-CoV-2 (COVID-19): Positive Negative Not done Unknown

Was other pathogen testing done during this illness episode? YES (complete section) NO Unknown

Influenza : Positive Negative Not done Unknown

If Positive: A-not typed A/H3N2 A/H1N1pdm09 A/H7N9 A/H5N1 B Other: \_\_\_\_\_ ..Unk

Respiratory Syncytial Virus (RSV): Positive Negative Not done Unknown

Adenovirus: Positive Negative Not done Unknown

**Section 2: BACTERIAL TESTING**

Bacteria: Positive Negative Not done If Positive, specify: \_\_\_\_\_ Unknown

Other pathogen/s detected: YES NO Unknown If YES, specify all: \_\_\_\_\_ Unknown

**Section 3: RADIOLOGY**

Clinical pneumonia diagnosed? YES NO Unknown

Chest X-Ray performed? YES NO Unknown If Yes: Were infiltrates present? YES NO Unknown

CT performed? YES NO Unknown If Yes: Were infiltrates present? YES NO Unknown

**COMPLICATIONS, continued**

**Endocarditis**

Endocarditis is an inflammation of the endocardium (inner lining of the heart). Diagnosis is according to modified Duke criteria, using evidence from microbiological results, echocardiogram and clinical signs.

**Cardiomyopathy**

Structural and functional disorders of myocardium commonly diagnosed by echocardiography. Can be primary (genetic) or secondary (e.g. following myocardial infarction). Physician diagnosis.

**Congestive heart failure**

Is defined as failure of the heart to pump a sufficient amount of blood to meet the needs of the body tissues, resulting in tissue congestion and oedema.

**Seizure**

Select 'yes' for any seizure regardless of cause (e.g. febrile or due to epilepsy)

**Stroke / Cerebrovascular accident**

Stroke may be a clinical diagnosis, with or without supportive radiological findings.

**Meningitis / Encephalitis**

Inflammation of the meninges or the brain parenchyma. Select yes if diagnosed clinically, radiologically or microbiologically.

**Bacteremia**

Growth of bacteria on a blood culture. Select 'no' if the only bacteria grown were believed to be skin contaminants (e.g. coagulase negative Staphylococci or diphtheroids).

**Coagulation disorder / DIC**

Abnormal coagulation identified by abnormal prothrombin time or activated partial thromboplastin time. Disseminated intravascular coagulation (DIC; consumption coagulopathy; defibrination syndrome) is defined by thrombocytopenia, prolonged prothrombin time, low fibrinogen, elevated D-dimer and thrombotic microangiopathy.

**Pulmonary embolism**

Obstruction of pulmonary artery by thrombus, air or fat. Physician diagnosis based on clinical signs, computed tomographic pulmonary angiography and/or ventilation/perfusion scanning.

**Deep Vein Thrombosis**

Blood clots in deep veins of leg, pelvis or arm. Physician diagnosis based on clinical signs, and/or duplex ultrasonography, d-dimer blood test, contrast venography or magnetic resonance imaging (MRI).

**Other thromboembolism (not Pulmonary Embolism or Deep Vein Thrombosis)**

Please record any other type of physician diagnosed thromboembolism

**MODULE 3: OUTCOME CASE REPORT FORM**

| COMPLICATIONS: At any time during hospitalisation did the patient experience: (Unk = Unknown) |                                                                              |                                         |                                                                              |
|-----------------------------------------------------------------------------------------------|------------------------------------------------------------------------------|-----------------------------------------|------------------------------------------------------------------------------|
| Viral pneumonia/pneumonitis                                                                   | <input type="radio"/> YES <input type="radio"/> NO <input type="radio"/> Unk | Meningitis / Encephalitis               | <input type="radio"/> YES <input type="radio"/> NO <input type="radio"/> Unk |
| Bacterial pneumonia                                                                           | <input type="radio"/> YES <input type="radio"/> NO <input type="radio"/> Unk | Bacteremia                              | <input type="radio"/> YES <input type="radio"/> NO <input type="radio"/> Unk |
| Acute Respiratory Distress Syndrome                                                           | <input type="radio"/> YES <input type="radio"/> NO <input type="radio"/> Unk | Coagulation disorder / DIC              | <input type="radio"/> YES <input type="radio"/> NO <input type="radio"/> Unk |
| Pneumothorax                                                                                  | <input type="radio"/> YES <input type="radio"/> NO <input type="radio"/> Unk | Pulmonary Embolism                      | <input type="radio"/> YES <input type="radio"/> NO <input type="radio"/> Unk |
| Pleural effusion                                                                              | <input type="radio"/> YES <input type="radio"/> NO <input type="radio"/> Unk | Deep Vein Thrombosis                    | <input type="radio"/> YES <input type="radio"/> NO <input type="radio"/> Unk |
| Cryptogenic organizing pneumonia (COP)                                                        | <input type="radio"/> YES <input type="radio"/> NO <input type="radio"/> Unk | Other thromboembolism (not PE or DVT)   | <input type="radio"/> YES <input type="radio"/> NO <input type="radio"/> Unk |
| Bronchiolitis                                                                                 | <input type="radio"/> YES <input type="radio"/> NO <input type="radio"/> Unk | Anemia                                  | <input type="radio"/> YES <input type="radio"/> NO <input type="radio"/> Unk |
| Cardiac arrest                                                                                | <input type="radio"/> YES <input type="radio"/> NO <input type="radio"/> Unk | Rhabdomyolysis / Myositis               | <input type="radio"/> YES <input type="radio"/> NO <input type="radio"/> Unk |
| Myocardial infarction                                                                         | <input type="radio"/> YES <input type="radio"/> NO <input type="radio"/> Unk | Acute renal injury/ Acute renal failure | <input type="radio"/> YES <input type="radio"/> NO <input type="radio"/> Unk |
| Cardiac ischaemia                                                                             | <input type="radio"/> YES <input type="radio"/> NO <input type="radio"/> Unk | Gastrointestinal haemorrhage            | <input type="radio"/> YES <input type="radio"/> NO <input type="radio"/> Unk |
| Cardiac arrhythmia                                                                            | <input type="radio"/> YES <input type="radio"/> NO <input type="radio"/> Unk | Pancreatitis                            | <input type="radio"/> YES <input type="radio"/> NO <input type="radio"/> Unk |
| Myocarditis / Pericarditis                                                                    | <input type="radio"/> YES <input type="radio"/> NO <input type="radio"/> Unk | Liver dysfunction                       | <input type="radio"/> YES <input type="radio"/> NO <input type="radio"/> Unk |
| Endocarditis                                                                                  | <input type="radio"/> YES <input type="radio"/> NO <input type="radio"/> Unk | Hyperglycemia                           | <input type="radio"/> YES <input type="radio"/> NO <input type="radio"/> Unk |
| Cardiomyopathy                                                                                | <input type="radio"/> YES <input type="radio"/> NO <input type="radio"/> Unk | Hypoglycemia                            | <input type="radio"/> YES <input type="radio"/> NO <input type="radio"/> Unk |
| Congestive heart failure                                                                      | <input type="radio"/> YES <input type="radio"/> NO <input type="radio"/> Unk | Other                                   | <input type="radio"/> YES <input type="radio"/> NO <input type="radio"/> Unk |
| Seizure                                                                                       | <input type="radio"/> YES <input type="radio"/> NO <input type="radio"/> Unk | If YES, specify: _____                  |                                                                              |
| Stroke / Cerebrovascular accident                                                             | <input type="radio"/> YES <input type="radio"/> NO <input type="radio"/> Unk |                                         |                                                                              |

| DIAGNOSTICS                                                                                                                                                                                                                              |                                                                                                                                                                                                     |
|------------------------------------------------------------------------------------------------------------------------------------------------------------------------------------------------------------------------------------------|-----------------------------------------------------------------------------------------------------------------------------------------------------------------------------------------------------|
| <b>Section 1: RESPIRATORY VIRUS PCR TESTING</b>                                                                                                                                                                                          |                                                                                                                                                                                                     |
| SARS-CoV-2 (COVID-19): <input type="radio"/> Positive <input type="radio"/> Negative <input type="radio"/> Not done <input type="radio"/> Unknown                                                                                        |                                                                                                                                                                                                     |
| Was other pathogen testing done during this illness episode? <input type="radio"/> YES (complete section) <input type="radio"/> NO <input type="radio"/> Unknown                                                                         |                                                                                                                                                                                                     |
| Influenza: <input type="radio"/> Positive <input type="radio"/> Negative <input type="radio"/> Not done <input type="radio"/> Unknown                                                                                                    |                                                                                                                                                                                                     |
| If Positive: <input type="radio"/> A-not typed <input type="radio"/> A/H3N2 <input type="radio"/> A/H1N1pdm09 <input type="radio"/> A/H7N9 <input type="radio"/> A/H5N1 <input type="radio"/> B <input type="radio"/> Other: _____ ..Unk |                                                                                                                                                                                                     |
| Respiratory Syncytial Virus (RSV): <input type="radio"/> Positive <input type="radio"/> Negative <input type="radio"/> Not done <input type="radio"/> Unknown                                                                            |                                                                                                                                                                                                     |
| Adenovirus: <input type="radio"/> Positive <input type="radio"/> Negative <input type="radio"/> Not done <input type="radio"/> Unknown                                                                                                   |                                                                                                                                                                                                     |
| <b>Section 2: BACTERIAL TESTING</b>                                                                                                                                                                                                      |                                                                                                                                                                                                     |
| Bacteria: <input type="radio"/> Positive <input type="radio"/> Negative <input type="radio"/> Not done If Positive, specify: _____ <input type="radio"/> Unknown                                                                         |                                                                                                                                                                                                     |
| Other pathogen/s detected: <input type="radio"/> YES <input type="radio"/> NO <input type="radio"/> Unknown If YES, specify all: _____ <input type="radio"/> Unknown                                                                     |                                                                                                                                                                                                     |
| <b>Section 3: RADIOLOGY</b>                                                                                                                                                                                                              |                                                                                                                                                                                                     |
| Clinical pneumonia diagnosed? <input type="radio"/> YES <input type="radio"/> NO <input type="radio"/> Unknown                                                                                                                           |                                                                                                                                                                                                     |
| Chest X-Ray performed?                                                                                                                                                                                                                   | <input type="radio"/> YES <input type="radio"/> NO <input type="radio"/> Unknown If Yes: Were infiltrates present? <input type="radio"/> YES <input type="radio"/> NO <input type="radio"/> Unknown |
| CT performed?                                                                                                                                                                                                                            | <input type="radio"/> YES <input type="radio"/> NO <input type="radio"/> Unknown If Yes: Were infiltrates present? <input type="radio"/> YES <input type="radio"/> NO <input type="radio"/> Unknown |

## COMPLICATIONS, continued

### Anemia

Select 'yes' if haemoglobin levels were lower than age- and sex-specific thresholds listed below

| Age or gender group                | Haemoglobin threshold |          |
|------------------------------------|-----------------------|----------|
|                                    | (g/L)                 | (mmol/l) |
| Age 6 months to 5 years            | 110                   | 6.8      |
| Age 5–12 years                     | 115                   | 7.1      |
| Age 12–15 years                    | 120                   | 7.4      |
| Age > 15 years, non-pregnant women | 120                   | 7.4      |
| Pregnant women                     | 110                   | 6.8      |
| Age >15 years, men                 | 130                   | 8.1      |

### Rhabdomyolysis / Myositis

Rhabdomyolysis is a syndrome characterised by muscle necrosis and the release of myoglobin into the blood. Muscle biopsy, electromyography, radiological imaging and the presence of myoglobinuria are not required for the diagnosis.

Myositis may be a clinical diagnosis with supporting evidence from laboratory tests e.g. elevated serum creatine kinase; histological confirmation is not required to make the diagnosis. Myositis can occur without progression to rhabdomyolysis.

### Acute renal injury/Acute renal failure

Acute renal injury is defined as any of:

- Increase in serum creatinine by  $\geq 0.3$  mg/dL ( $\geq 26.5$   $\mu$ mol/L) within 48 hours
- Increase in serum creatinine to  $\geq 1.5$  times baseline, which is known or presumed to have occurred within the prior 7 days
- Urine volume  $< 0.5$  mL/kg/hour for 6 hours

### Gastrointestinal haemorrhage

Refers to bleeding originating from any part of the gastrointestinal tract (from the oropharynx to the rectum).

### Pancreatitis

Inflammation of the pancreas, diagnosed from clinical, biochemical, radiological or histological evidence.

## MODULE 3: OUTCOME CASE REPORT FORM

| COMPLICATIONS: At any time during hospitalisation did the patient experience: (Unk = Unknown) |                                                                              |                                         |                                                                              |
|-----------------------------------------------------------------------------------------------|------------------------------------------------------------------------------|-----------------------------------------|------------------------------------------------------------------------------|
| Viral pneumonia/pneumonitis                                                                   | <input type="radio"/> YES <input type="radio"/> NO <input type="radio"/> Unk | Meningitis / Encephalitis               | <input type="radio"/> YES <input type="radio"/> NO <input type="radio"/> Unk |
| Bacterial pneumonia                                                                           | <input type="radio"/> YES <input type="radio"/> NO <input type="radio"/> Unk | Bacteremia                              | <input type="radio"/> YES <input type="radio"/> NO <input type="radio"/> Unk |
| Acute Respiratory Distress Syndrome                                                           | <input type="radio"/> YES <input type="radio"/> NO <input type="radio"/> Unk | Coagulation disorder / DIC              | <input type="radio"/> YES <input type="radio"/> NO <input type="radio"/> Unk |
| Pneumothorax                                                                                  | <input type="radio"/> YES <input type="radio"/> NO <input type="radio"/> Unk | Pulmonary Embolism                      | <input type="radio"/> YES <input type="radio"/> NO <input type="radio"/> Unk |
| Pleural effusion                                                                              | <input type="radio"/> YES <input type="radio"/> NO <input type="radio"/> Unk | Deep Vein Thrombosis                    | <input type="radio"/> YES <input type="radio"/> NO <input type="radio"/> Unk |
| Cryptogenic organizing pneumonia (COP)                                                        | <input type="radio"/> YES <input type="radio"/> NO <input type="radio"/> Unk | Other thromboembolism (not PE or DVT)   | <input type="radio"/> YES <input type="radio"/> NO <input type="radio"/> Unk |
| Bronchiolitis                                                                                 | <input type="radio"/> YES <input type="radio"/> NO <input type="radio"/> Unk | Anemia                                  | <input type="radio"/> YES <input type="radio"/> NO <input type="radio"/> Unk |
| Cardiac arrest                                                                                | <input type="radio"/> YES <input type="radio"/> NO <input type="radio"/> Unk | Rhabdomyolysis / Myositis               | <input type="radio"/> YES <input type="radio"/> NO <input type="radio"/> Unk |
| Myocardial infarction                                                                         | <input type="radio"/> YES <input type="radio"/> NO <input type="radio"/> Unk | Acute renal injury/ Acute renal failure | <input type="radio"/> YES <input type="radio"/> NO <input type="radio"/> Unk |
| Cardiac ischaemia                                                                             | <input type="radio"/> YES <input type="radio"/> NO <input type="radio"/> Unk | Gastrointestinal haemorrhage            | <input type="radio"/> YES <input type="radio"/> NO <input type="radio"/> Unk |
| Cardiac arrhythmia                                                                            | <input type="radio"/> YES <input type="radio"/> NO <input type="radio"/> Unk | Pancreatitis                            | <input type="radio"/> YES <input type="radio"/> NO <input type="radio"/> Unk |
| Myocarditis / Pericarditis                                                                    | <input type="radio"/> YES <input type="radio"/> NO <input type="radio"/> Unk | Liver dysfunction                       | <input type="radio"/> YES <input type="radio"/> NO <input type="radio"/> Unk |
| Endocarditis                                                                                  | <input type="radio"/> YES <input type="radio"/> NO <input type="radio"/> Unk | Hyperglycemia                           | <input type="radio"/> YES <input type="radio"/> NO <input type="radio"/> Unk |
| Cardiomyopathy                                                                                | <input type="radio"/> YES <input type="radio"/> NO <input type="radio"/> Unk | Hypoglycemia                            | <input type="radio"/> YES <input type="radio"/> NO <input type="radio"/> Unk |
| Congestive heart failure                                                                      | <input type="radio"/> YES <input type="radio"/> NO <input type="radio"/> Unk | Other                                   | <input type="radio"/> YES <input type="radio"/> NO <input type="radio"/> Unk |
| Seizure                                                                                       | <input type="radio"/> YES <input type="radio"/> NO <input type="radio"/> Unk | If YES, specify: _____                  |                                                                              |
| Stroke / Cerebrovascular accident                                                             | <input type="radio"/> YES <input type="radio"/> NO <input type="radio"/> Unk |                                         |                                                                              |

| DIAGNOSTICS                                                  |                                                                                                                                                                                                                             |
|--------------------------------------------------------------|-----------------------------------------------------------------------------------------------------------------------------------------------------------------------------------------------------------------------------|
| <b>Section 1: RESPIRATORY VIRUS PCR TESTING</b>              |                                                                                                                                                                                                                             |
| SARS-CoV-2 (COVID-19):                                       | <input type="radio"/> Positive <input type="radio"/> Negative <input type="radio"/> Not done <input type="radio"/> Unknown                                                                                                  |
| Was other pathogen testing done during this illness episode? | <input type="radio"/> YES (complete section) <input type="radio"/> NO <input type="radio"/> Unknown                                                                                                                         |
| Influenza:                                                   | <input type="radio"/> Positive <input type="radio"/> Negative <input type="radio"/> Not done <input type="radio"/> Unknown                                                                                                  |
| If Positive:                                                 | <input type="radio"/> A-not typed <input type="radio"/> A/H3N2 <input type="radio"/> A/H1N1pdm09 <input type="radio"/> A/H7N9 <input type="radio"/> A/H5N1 <input type="radio"/> B <input type="radio"/> Other: _____ ..Unk |
| Respiratory Syncytial Virus (RSV):                           | <input type="radio"/> Positive <input type="radio"/> Negative <input type="radio"/> Not done <input type="radio"/> Unknown                                                                                                  |
| Adenovirus:                                                  | <input type="radio"/> Positive <input type="radio"/> Negative <input type="radio"/> Not done <input type="radio"/> Unknown                                                                                                  |
| <b>Section 2: BACTERIAL TESTING</b>                          |                                                                                                                                                                                                                             |
| Bacteria:                                                    | <input type="radio"/> Positive <input type="radio"/> Negative <input type="radio"/> Not done If Positive, specify: _____ <input type="radio"/> Unknown                                                                      |
| Other pathogen/s detected:                                   | <input type="radio"/> YES <input type="radio"/> NO <input type="radio"/> Unknown If YES, specify all: _____ <input type="radio"/> Unknown                                                                                   |
| <b>Section 3: RADIOLOGY</b>                                  |                                                                                                                                                                                                                             |
| Clinical pneumonia diagnosed?                                | <input type="radio"/> YES <input type="radio"/> NO <input type="radio"/> Unknown                                                                                                                                            |
| Chest X-Ray performed?                                       | <input type="radio"/> YES <input type="radio"/> NO <input type="radio"/> Unknown If Yes: Were infiltrates present? <input type="radio"/> YES <input type="radio"/> NO <input type="radio"/> Unknown                         |
| CT performed?                                                | <input type="radio"/> YES <input type="radio"/> NO <input type="radio"/> Unknown If Yes: Were infiltrates present? <input type="radio"/> YES <input type="radio"/> NO <input type="radio"/> Unknown                         |

### COMPLICATIONS, continued

#### Liver dysfunction

A finding that indicates abnormal liver function, may refer to any of the following:

- Clinical jaundice
- Hyperbilirubinaemia (blood bilirubin level twice the upper limit of the normal range)
- An increase in alanine transaminase or aspartate transaminase that is twice the upper limit of the normal range

#### Hyperglycaemia

For adults, is defined as an abnormally high level of glucose in the blood, blood glucose level that is consistently above 126mg/dL or 7 mmol/L. For children, is defined as a blood glucose level consistently above 8.3 mmol/L.

#### Hypoglycaemia

For adults, is defined as an abnormally low level of glucose in the blood, a blood glucose level that is consistently below 70mg/dL or 4 mmol/L. For children, is defined as a blood glucose level below 3 mmol/L.

#### Other

Please specify other complications in the space provided.

### DIAGNOSTICS

#### Radiology

##### Chest X-Ray/ CT performed?

Record if X-ray and/or CT were performed, even if no infiltrates were present.

### MODULE 3: OUTCOME CASE REPORT FORM

| COMPLICATIONS: At any time during hospitalisation did the patient experience: (Unk = Unknown) |                                                                              |                                         |                                                                              |
|-----------------------------------------------------------------------------------------------|------------------------------------------------------------------------------|-----------------------------------------|------------------------------------------------------------------------------|
| Viral pneumonia/pneumonitis                                                                   | <input type="radio"/> YES <input type="radio"/> NO <input type="radio"/> Unk | Meningitis / Encephalitis               | <input type="radio"/> YES <input type="radio"/> NO <input type="radio"/> Unk |
| Bacterial pneumonia                                                                           | <input type="radio"/> YES <input type="radio"/> NO <input type="radio"/> Unk | Bacteremia                              | <input type="radio"/> YES <input type="radio"/> NO <input type="radio"/> Unk |
| Acute Respiratory Distress Syndrome                                                           | <input type="radio"/> YES <input type="radio"/> NO <input type="radio"/> Unk | Coagulation disorder / DIC              | <input type="radio"/> YES <input type="radio"/> NO <input type="radio"/> Unk |
| Pneumothorax                                                                                  | <input type="radio"/> YES <input type="radio"/> NO <input type="radio"/> Unk | Pulmonary Embolism                      | <input type="radio"/> YES <input type="radio"/> NO <input type="radio"/> Unk |
| Pleural effusion                                                                              | <input type="radio"/> YES <input type="radio"/> NO <input type="radio"/> Unk | Deep Vein Thrombosis                    | <input type="radio"/> YES <input type="radio"/> NO <input type="radio"/> Unk |
| Cryptogenic organizing pneumonia (COP)                                                        | <input type="radio"/> YES <input type="radio"/> NO <input type="radio"/> Unk | Other thromboembolism (not PE or DVT)   | <input type="radio"/> YES <input type="radio"/> NO <input type="radio"/> Unk |
| Bronchiolitis                                                                                 | <input type="radio"/> YES <input type="radio"/> NO <input type="radio"/> Unk | Anemia                                  | <input type="radio"/> YES <input type="radio"/> NO <input type="radio"/> Unk |
| Cardiac arrest                                                                                | <input type="radio"/> YES <input type="radio"/> NO <input type="radio"/> Unk | Rhabdomyolysis / Myositis               | <input type="radio"/> YES <input type="radio"/> NO <input type="radio"/> Unk |
| Myocardial infarction                                                                         | <input type="radio"/> YES <input type="radio"/> NO <input type="radio"/> Unk | Acute renal injury/ Acute renal failure | <input type="radio"/> YES <input type="radio"/> NO <input type="radio"/> Unk |
| Cardiac ischaemia                                                                             | <input type="radio"/> YES <input type="radio"/> NO <input type="radio"/> Unk | Gastrointestinal haemorrhage            | <input type="radio"/> YES <input type="radio"/> NO <input type="radio"/> Unk |
| Cardiac arrhythmia                                                                            | <input type="radio"/> YES <input type="radio"/> NO <input type="radio"/> Unk | Pancreatitis                            | <input type="radio"/> YES <input type="radio"/> NO <input type="radio"/> Unk |
| Myocarditis / Pericarditis                                                                    | <input type="radio"/> YES <input type="radio"/> NO <input type="radio"/> Unk | Liver dysfunction                       | <input type="radio"/> YES <input type="radio"/> NO <input type="radio"/> Unk |
| Endocarditis                                                                                  | <input type="radio"/> YES <input type="radio"/> NO <input type="radio"/> Unk | Hyperglycemia                           | <input type="radio"/> YES <input type="radio"/> NO <input type="radio"/> Unk |
| Cardiomyopathy                                                                                | <input type="radio"/> YES <input type="radio"/> NO <input type="radio"/> Unk | Hypoglycemia                            | <input type="radio"/> YES <input type="radio"/> NO <input type="radio"/> Unk |
| Congestive heart failure                                                                      | <input type="radio"/> YES <input type="radio"/> NO <input type="radio"/> Unk | Other                                   | <input type="radio"/> YES <input type="radio"/> NO <input type="radio"/> Unk |
| Seizure                                                                                       | <input type="radio"/> YES <input type="radio"/> NO <input type="radio"/> Unk | If YES, specify: _____                  |                                                                              |
| Stroke / Cerebrovascular accident                                                             | <input type="radio"/> YES <input type="radio"/> NO <input type="radio"/> Unk |                                         |                                                                              |

### DIAGNOSTICS

#### Section 1: RESPIRATORY VIRUS PCR TESTING

SARS-CoV-2 (COVID-19):  Positive  Negative  Not done  Unknown

Was other pathogen testing done during this illness episode?  YES (complete section)  NO  Unknown

Influenza:  Positive  Negative  Not done  Unknown

If Positive:  A-not typed  A/H3N2  A/H1N1pdm09  A/H7N9  A/H5N1  B  Other: \_\_\_\_\_ ..Unk

Respiratory Syncytial Virus (RSV):  Positive  Negative  Not done  Unknown

Adenovirus:  Positive  Negative  Not done  Unknown

#### Section 2: BACTERIAL TESTING

Bacteria:  Positive  Negative  Not done If Positive, specify: \_\_\_\_\_  Unknown

Other pathogen/s detected:  YES  NO  Unknown If YES, specify all: \_\_\_\_\_  Unknown

#### Section 3: RADIOLOGY

Clinical pneumonia diagnosed?  YES  NO  Unknown

Chest X-Ray performed?  YES  NO  Unknown If Yes: Were infiltrates present?  YES  NO  Unknown

CT performed?  YES  NO  Unknown If Yes: Were infiltrates present?  YES  NO  Unknown



#### DIAGNOSTICS, continued

##### Pathogen Testing Details

##### Details of pathogen testing per biospecimen type

If the patient had samples taken for pathogen detection testing during their hospital stay, please complete a row for every type of sample collected (e.g. nasal/NP swab, sputum, etc.).

Where both positive and negative results for a particular sample type exist (from samples taken at different time points during the patient’s hospital stay) please record the earliest positive result.

If results are indeterminate’ or considered by the clinical team to represent contamination/colonisation, record on the form as Negative.

If only multiple negative results exist for a particular sample type (from samples taken at different time points during the patient’s hospital stay), please document the earliest negative result.

##### MEDICATION

##### While hospitalised or at discharge, were any of the following administered?

##### Antiviral or COVID-19 targeted agent

Record all antivirals or COVID-19 targeted agents administered from date of admission or during the hospitalisation. Record the total number of days the treatment was given.

Additional space is available under ‘Other treatments...’ at the end of this section if required

#### MODULE 3: OUTCOME CASE REPORT FORM

| DIAGNOSTICS <i>continued</i>        |                                                                                                                                                                                                                                                                                                                                                                     |                                                                                                           |                                                                                                   |                          |
|-------------------------------------|---------------------------------------------------------------------------------------------------------------------------------------------------------------------------------------------------------------------------------------------------------------------------------------------------------------------------------------------------------------------|-----------------------------------------------------------------------------------------------------------|---------------------------------------------------------------------------------------------------|--------------------------|
| Section 4: PATHOGEN TESTING DETAILS |                                                                                                                                                                                                                                                                                                                                                                     |                                                                                                           |                                                                                                   |                          |
| Collection Date<br>(DD/MM/YYYY)     | Biospecimen Type                                                                                                                                                                                                                                                                                                                                                    | Laboratory test Method                                                                                    | Result                                                                                            | Pathogen Tested/Detected |
| __/__/__                            | <input type="radio"/> Nasal/NP swab <input type="radio"/> Throat swab<br><input type="radio"/> Combined nasal/NP+throat swab<br><input type="radio"/> Sputum <input type="radio"/> BAL <input type="radio"/> ETA <input type="radio"/> Urine<br><input type="radio"/> Faeces/rectal swab <input type="radio"/> Blood<br><input type="radio"/> Other, Specify: _____ | <input type="radio"/> PCR<br><input type="radio"/> Culture<br><input type="radio"/> Other, Specify: _____ | <input type="radio"/> Positive<br><input type="radio"/> Negative<br><input type="radio"/> Unknown | _____                    |
| __/__/__                            | <input type="radio"/> Nasal/NP swab <input type="radio"/> Throat swab<br><input type="radio"/> Combined nasal/NP+throat swab<br><input type="radio"/> Sputum <input type="radio"/> BAL <input type="radio"/> ETA <input type="radio"/> Urine<br><input type="radio"/> Faeces/rectal swab <input type="radio"/> Blood<br><input type="radio"/> Other, Specify: _____ | <input type="radio"/> PCR<br><input type="radio"/> Culture<br><input type="radio"/> Other, Specify: _____ | <input type="radio"/> Positive<br><input type="radio"/> Negative<br><input type="radio"/> Unknown | _____                    |
| __/__/__                            | <input type="radio"/> Nasal/NP swab <input type="radio"/> Throat swab<br><input type="radio"/> Combined nasal/NP+throat swab<br><input type="radio"/> Sputum <input type="radio"/> BAL <input type="radio"/> ETA <input type="radio"/> Urine<br><input type="radio"/> Faeces/rectal swab <input type="radio"/> Blood<br><input type="radio"/> Other, Specify: _____ | <input type="radio"/> PCR<br><input type="radio"/> Culture<br><input type="radio"/> Other, Specify: _____ | <input type="radio"/> Positive<br><input type="radio"/> Negative<br><input type="radio"/> Unknown | _____                    |
| __/__/__                            | <input type="radio"/> Nasal/NP swab <input type="radio"/> Throat swab<br><input type="radio"/> Combined nasal/NP+throat swab<br><input type="radio"/> Sputum <input type="radio"/> BAL <input type="radio"/> ETA <input type="radio"/> Urine<br><input type="radio"/> Faeces/rectal swab <input type="radio"/> Blood<br><input type="radio"/> Other, Specify: _____ | <input type="radio"/> PCR<br><input type="radio"/> Culture<br><input type="radio"/> Other, Specify: _____ | <input type="radio"/> Positive<br><input type="radio"/> Negative<br><input type="radio"/> Unknown | _____                    |

| MEDICATION: While hospitalised or at discharge, were any of the following administered? (Unk=Unknown)                                                                                                                                                                                                                                                      |  |
|------------------------------------------------------------------------------------------------------------------------------------------------------------------------------------------------------------------------------------------------------------------------------------------------------------------------------------------------------------|--|
| <b>ANTIVIRAL OR COVID-19 TARGETED AGENT? <input type="radio"/> YES <input type="radio"/> NO <input type="radio"/> Unknown    If YES, specify (all) :</b>                                                                                                                                                                                                   |  |
| <input type="checkbox"/> Ribavirin    Date commenced [D][D]/[M][M]/[2][0][Y][Y] <input type="radio"/> Unk    Duration: _____ days <input type="radio"/> Unk                                                                                                                                                                                                |  |
| <input type="checkbox"/> Lopinavir/Ritonavir    Date commenced [D][D]/[M][M]/[2][0][Y][Y] <input type="radio"/> Unk    Duration: _____ days <input type="radio"/> Unk                                                                                                                                                                                      |  |
| <input type="checkbox"/> Remdesivir (Veklury)    Date commenced [D][D]/[M][M]/[2][0][Y][Y] <input type="radio"/> Unk    Duration: _____ days <input type="radio"/> Unk                                                                                                                                                                                     |  |
| <input type="checkbox"/> Interferon alpha    Date commenced [D][D]/[M][M]/[2][0][Y][Y] <input type="radio"/> Unk    Duration: _____ days <input type="radio"/> Unk                                                                                                                                                                                         |  |
| <input type="checkbox"/> Interferon beta    Date commenced [D][D]/[M][M]/[2][0][Y][Y] <input type="radio"/> Unk    Duration: _____ days <input type="radio"/> Unk                                                                                                                                                                                          |  |
| <input type="checkbox"/> Chloroquine/hydroxychloroquine:<br>Date commenced [D][D]/[M][M]/[2][0][Y][Y] <input type="radio"/> Unk...    Duration: _____ days <input type="radio"/> Unk                                                                                                                                                                       |  |
| <input type="checkbox"/> Interleukin-6 (IL-6) inhibitor    IF YES which: <input type="checkbox"/> Tocilizumab <input type="checkbox"/> Sarilumab <input type="checkbox"/> Other IL-6 inhibitor _____ <input type="radio"/> Unk<br>Date commenced [D][D]/[M][M]/[2][0][Y][Y] <input type="radio"/> Unk...    Duration: _____ days <input type="radio"/> Unk |  |
| <input type="checkbox"/> Convalescent plasma    Date commenced [D][D]/[M][M]/[2][0][Y][Y] <input type="radio"/> Unk    Duration: _____ days <input type="radio"/> Unk                                                                                                                                                                                      |  |
| <input type="checkbox"/> Anti-influenza anti-viral    IF YES which: <input type="checkbox"/> Oseltamivir (Tamiflu®) <input type="checkbox"/> Zanamivir <input type="radio"/> Unk<br>Date commenced [D][D]/[M][M]/[2][0][Y][Y] <input type="radio"/> Unk...    Duration: _____ days <input type="radio"/> Unk                                               |  |
| <input type="checkbox"/> Other _____    Date commenced [D][D]/[M][M]/[2][0][Y][Y] <input type="radio"/> Unk<br>duration: _____ days <input type="radio"/> Unk                                                                                                                                                                                              |  |

**MEDICATION, continued**

**Antibiotic**

‘Antibiotic’ refers to any agent(s) are substances naturally produced by microorganisms or their derivatives that selectively target microorganisms. These substances are used in the treatment of bacterial and other microbial infections. Topical preparations are not included.

**Corticosteroid**

‘Corticosteroids’ (commonly referred to as ‘steroids’) refers to all types of therapeutic corticosteroid, made in the adrenal cortex (the outer part of the adrenal gland). They are also made in the laboratory. Examples include: prednisolone, prednisone, methyl-prednisolone, dexamethasone, hydrocortisone, fluticasone, betamethasone (note that other examples exist). Topical preparations are not included, but inhaled preparations are included. The indication for administering corticosteroids does not need to be directly related to the treatment of COVID-19.

**Anticoagulants**

These include heparin, enoxaparin, apixaban, dabigatran, rivaroxaban, edoxaban, warfarin. For heparin treatment, please specify if unfractionated or low molecular weight heparin was administered.

**Antifungal Agent**

‘Antifungal agent’ refers to any agent(s) prescribed specifically to treat systemic or topical infections caused by fungi. Examples include fluconazole, amphotericin, caspofungin, anidulafungin, posaconazole, itraconazole (note that other examples exist). Topical preparations should not be recorded.

**Other treatment administered for COVID-19**

Record any other medications, experimental or re-purposed, administered to modify the course of COVID-19 during the admission (including as part of a clinical trial). This could include convalescent plasma, immuno-modulatory agents and anti-viral agents not already recorded above.

**MODULE 3: OUTCOME CASE REPORT FORM**

**MEDICATION (continued):**

**ANTIBIOTIC?**  YES  NO  Unknown **If yes, specify all:**

Agent 1: \_\_\_\_\_ Date commenced [D][D]/[M][M]/[2][0][Y][Y] Duration: \_\_\_\_ days  Unk

Agent 2: \_\_\_\_\_ Date commenced [D][D]/[M][M]/[2][0][Y][Y] Duration: \_\_\_\_ days  Unk

Agent 3: \_\_\_\_\_ Date commenced [D][D]/[M][M]/[2][0][Y][Y] Duration: \_\_\_\_ days  Unk

---

**CORTICOSTEROID?**  YES  NO  Unknown

**If YES: Dexamethasone?**  YES  NO  Unknown

**If YES, check all that apply:**

6mg once per day (od)?  YES  NO  Unknown **If YES, Route:**  Oral  Intravenous  Unk

**If YES, Date commenced** [D][D]/[M][M]/[2][0][Y][Y] **Duration:** \_\_\_\_ days  Unk

other dose or frequency?  YES  NO  Unknown **If YES, Route:**  Oral  Intravenous  Unk

**If YES, Date commenced** [D][D]/[M][M]/[2][0][Y][Y] **Duration:** \_\_\_\_ days  Unk

**If YES: Other corticosteroid?**  YES  NO  Unknown

**If YES: Which steroid:**  Prednisolone  Hydrocortisone  Methylprednisolone  Other

**Route:**  Oral  Intravenous  Unk

---

**ANTICOAGULATION?**  YES  NO  Unk

**If YES: Agent:** \_\_\_\_\_

**Route:**  Subcutaneous  Intravenous (IV)  Unk

**Indication:**  therapeutic (treatment of DVT/PE)  enhanced prophylaxis for COVID-19  routine inpatient prophylaxis  Unk

---

**ANTIFUNGAL AGENT?**  YES  NO  Unk

---

**OTHER treatments administered for COVID-19 including experimental or compassionate use?**  YES  NO  Unk

**If YES, specify agent and timing of administration:**

Agent 1: \_\_\_\_\_

Date commenced [D][D]/[M][M]/[2][0][Y][Y]  Unk **Duration:** \_\_\_\_ days  Unk

Agent 2: \_\_\_\_\_

Date commenced [D][D]/[M][M]/[2][0][Y][Y]  Unk **Duration:** \_\_\_\_ days  Unk

Agent 3: \_\_\_\_\_

Date commenced [D][D]/[M][M]/[2][0][Y][Y]  Unk **Duration:** \_\_\_\_ days  Unk

**OUTCOME**

**Was patient diagnosed with Covid-19?**

Please confirm method of diagnosis, confirming diagnosis by clinical assessment only if no positive laboratory result was obtained.

**Variants of Concern (VOC) and Variants of Interest (VOI).**

Please record any information you have on variants given a Greek letter designation even if the variant is no longer classified as a VOC or VOI by WHO. The list of variants will not be updated regularly on the paper CRF but will be kept up-to-date on the REDCap database.

**Discharged alive** can mean discharge to their usual place of residence before their illness, to the home of a relative or friend, or to a social care facility, because their illness is no longer severe enough to warrant treatment in a medical facility.

**Hospitalized** means they are still in hospital but have recovered from COVID-19 infection and the form has been completed as the patient is in a part of the hospital for care of other conditions and where the form will not be completed at a later date.

**Transfer to other facility** means they have been transferred to another facility that provides medical care. This could be a specialist centre for more intensive treatment or a step-down for rehabilitation. It does not include facilities that solely provide social care (these patients should be listed as discharged alive).

**Death** means the patient died in the hospital.

**Palliative discharge** means the patient has been discharged with the expectation that they will not recover from this or other co-existing illness. This could be to a specialist hospice facility, or to their usual home address with anticipatory end of life medications.

**Outcome date** Please state the date for the outcome listed above.

**If Discharged Alive: (answer these questions only if outcome is 'Discharged Alive')**

**Ability to self-care at discharge versus before illness:** the patient is able to care for themselves at discharge (in terms of activities of daily living) at the same level as before they developed illness then tick 'same as before illness'. If their ability to self-care has decreased or increased, then tick the appropriate circle ('worse' or 'better').

**Post-discharge treatment**

**Oxygen therapy** includes, NIV or home ventilation (respiratory support/treatment).

**MODULE 3: OUTCOME CASE REPORT FORM**

**OUTCOME**

Was patient diagnosed with Covid-19?  YES  NO  Unknown

If yes, was the diagnosis based on:  Laboratory confirmation  clinical assessment

Has a variant of concern (VOC) or variant of interest (VOI) been identified in this patient?

- Unknown
- Yes, a variant not listed below
- Alpha - B.1.1.7, identified in UK Sept 2020
- Beta - B.1.351, identified in South Africa May 2020
- Gamma - P.1, identified in Brazil Nov 2020
- Delta - B.1.617.2, identified in India Oct 2020
- Epsilon - B.1.427/B.1.429, identified in USA Mar 2021
- Zeta - P.2, identified in Brazil Apr 2020
- Eta - B.1.525, identified in Multiple Countries Dec 2020
- Theta - P.3, identified in Philippines Jan 2021
- Iota - B.1.526, identified in USA Nov 2020
- Kappa - B.1.617.1, identified in India Oct 2020
- Lambda - C.37, identified in Peru Dec 2020

*Please check the REDCAP database for variants not listed above. New variants will be added to the database as they are identified.*

**Outcome:**  Discharged alive  Hospitalised  Transfer to other facility  Death  Palliative discharge  Unknown

**Outcome date:** [ \_ ] [ \_ ] [ \_ ] / [ \_ ] [ \_ ] [ \_ ] / [ \_ ] [ \_ ] [ \_ ]  Unknown

**If alive at outcome date:**

**Ability to self-care at discharge versus before illness:**  Same as before illness  Worse  Better  Unknown

**Post-discharge treatment: Oxygen therapy?**  YES  NO  Unknown

**Ongoing health care needs relating to this admission for COVID-19:**  YES  NO  Unknown

**Ongoing health care needs NOT related to COVID episode:**  YES  NO  Unknown

**Medically fit for discharge (COVID-19 resolved) but remains in hospital for other reason (e.g. awaiting suitable care in community, resident in long term health care or mental health facility):**  YES  NO  Unknown
